# Supplementary material for: Molecular Genomic Analyses of Enterococcus cecorum from Sepsis Outbreaks in Broilers
Source: Microorganisms. 2024 Jan 25;12(2):250. doi: 10.3390/microorganisms12020250 (PMC10892122; doi:10.3390/microorganisms12020250)
Supplement: Supplementary file 1 [file microorganisms-12-00250-s001.zip › Supplementary Tables.xlsx]

## Sheet: Table S1
Table S1. Phenotypic group assignments for the 227 isolate genomes used in this work. For each isolate it was classified relative to each of phenotype traits scored as 0-not in trait group; 1- in trait group; NA- not applicable.
	Trait Group
Strain	None	Chicken Disease	BCO	Sepsis Strict	Sepsis Strict Reduced	CIRMBP Cluster1
1415	0	1	1	0	0	NA
1552	1	0	0	0	NA	NA
1675	0	1	1	0	0	NA
1749	0	1	0	1	1	NA
1750	0	1	0	1	1	NA
1751	1	0	0	0	NA	NA
1752	0	1	0	1	1	NA
1753	0	1	0	1	1	NA
1754	1	0	0	0	NA	NA
1755	0	1	0	1	NA	NA
1756	0	1	0	1	NA	NA
1757	0	1	0	1	1	NA
1758	0	1	0	1	NA	NA
100AEA1	1	0	0	0	NA	NA
108EA1	1	0	0	0	NA	NA
1212-11909	1	0	0	0	NA	NA
170AEA1	1	0	0	0	NA	NA
1710s23	1	0	0	0	NA	NA
1711s24	1	0	0	0	NA	NA
197EA2	1	0	0	0	NA	NA
215EA1	1	0	0	0	NA	NA
2D5_DIV0622	1	0	0	0	NA	NA
An144	1	0	0	0	NA	NA
An483	1	0	0	0	NA	NA
An69	1	0	0	0	NA	NA
ARS16	1	0	0	0	NA	NA
ARS48	1	0	0	0	NA	NA
ARS57	1	0	0	0	NA	NA
ARS60	1	0	0	0	NA	NA
ARS62	1	0	0	0	NA	NA
ARS64	1	0	0	0	NA	NA
ARS65	1	0	0	0	NA	NA
ARS71	1	0	0	0	NA	NA
ARS9	1	0	0	0	NA	NA
AS21	1	0	0	0	NA	NA
ATCC43198a	1	0	0	0	NA	NA
ATCC43198b	1	0	0	0	NA	NA
B05581	1	0	0	0	NA	NA
BB-66	1	0	0	0	NA	NA
BRZ_PB__bin29	1	0	0	0	NA	NA
CB-32	1	0	0	0	NA	NA
CE1	1	0	0	0	NA	NA
CE2	1	0	0	0	NA	NA
CE3	1	0	0	0	NA	NA
CHD112EN	0	1	1	0	0	NA
CHD121EN	0	1	1	0	0	NA
CHD139EN	0	1	1	0	0	NA
CHD140EN	0	1	1	0	0	NA
CHD141EN	0	1	1	0	0	NA
CHD158EN	0	1	1	0	0	NA
CHD161EN	0	1	1	0	0	NA
CHD182EN	1	0	0	0	NA	NA
CHD192EN	1	0	0	0	NA	NA
CHD1EN	1	0	0	0	NA	NA
CHD222EN	1	0	0	0	NA	NA
CHD259EN	1	0	0	0	NA	NA
CHD261EN	0	1	1	0	0	NA
CHD263EN	0	1	1	0	0	NA
CHD265EN	0	1	1	0	0	NA
CHD26EN	1	0	0	0	NA	NA
CHD270EN	0	1	1	0	0	NA
CHD278EN	0	1	1	0	0	NA
CHD285EN	0	1	1	0	0	NA
CHD288EN	0	1	1	0	0	NA
CHD293EN	0	1	1	0	0	NA
CHD319EN	0	1	1	0	0	NA
CHD341EN	0	1	1	0	0	NA
CHD347EN	0	1	1	0	0	NA
CHD37EN	1	0	0	0	NA	NA
CHD49EN	1	0	0	0	NA	NA
CHD62EN	1	0	0	0	NA	NA
CHD78EN	1	0	0	0	NA	NA
CHD83EN	1	0	0	0	NA	NA
CHD94EN	1	0	0	0	NA	NA
CHD96EN	1	0	0	0	NA	NA
CIRMBP-1195	1	0	0	0	NA	NA
CIRMBP-1196	1	0	0	0	NA	NA
CIRMBP-1197	1	0	0	0	NA	NA
CIRMBP-1205	0	1	1	0	0	0
CIRMBP-1206	0	1	1	0	0	0
CIRMBP-1207	0	1	1	0	0	NA
CIRMBP-1208	0	1	1	0	0	0
CIRMBP-1209	0	1	1	0	0	0
CIRMBP-1210	0	1	1	0	0	NA
CIRMBP-1211	0	1	0	1	1	1
CIRMBP-1212	0	1	1	0	0	NA
CIRMBP-1213	0	1	1	0	0	0
CIRMBP-1214	0	1	1	0	0	NA
CIRMBP-1215	0	1	1	0	0	0
CIRMBP-1216	0	1	1	0	0	0
CIRMBP-1217	0	1	1	0	0	0
CIRMBP-1218	0	1	0	1	1	1
CIRMBP-1219	0	1	0	1	1	NA
CIRMBP-1220	0	1	1	0	0	0
CIRMBP-1221	0	1	1	0	0	0
CIRMBP-1222	0	1	1	0	0	NA
CIRMBP-1223	0	1	1	0	0	0
CIRMBP-1224	0	1	1	0	0	0
CIRMBP-1225	0	1	1	0	0	NA
CIRMBP-1226	0	1	1	0	0	NA
CIRMBP-1227	0	1	1	0	0	0
CIRMBP-1228	0	1	1	0	0	0
CIRMBP-1229	0	1	1	1	1	1
CIRMBP-1230	0	1	1	0	0	0
CIRMBP-1231	0	1	1	0	0	NA
CIRMBP-1232	0	1	1	0	0	NA
CIRMBP-1233	0	1	1	0	0	0
CIRMBP-1234	0	1	1	0	0	NA
CIRMBP-1235	0	1	1	0	0	NA
CIRMBP-1236	0	1	1	0	0	NA
CIRMBP-1237	0	1	1	0	0	NA
CIRMBP-1238	0	1	0	1	1	NA
CIRMBP-1239	0	1	1	0	0	0
CIRMBP-1240	0	1	1	0	0	NA
CIRMBP-1241	0	1	1	0	0	NA
CIRMBP-1242	0	1	1	0	0	NA
CIRMBP-1243	0	1	1	0	0	NA
CIRMBP-1244	0	1	1	0	0	NA
CIRMBP-1245	0	1	1	0	0	NA
CIRMBP-1246	0	1	1	0	0	NA
CIRMBP-1247	0	1	0	1	1	1
CIRMBP-1248	0	1	1	0	0	0
CIRMBP-1249	0	1	1	0	0	0
CIRMBP-1250	0	1	1	0	0	NA
CIRMBP-1251	0	1	0	1	1	NA
CIRMBP-1252	0	1	1	0	0	0
CIRMBP-1253	0	1	1	0	0	NA
CIRMBP-1254	0	1	1	0	0	NA
CIRMBP-1255	0	1	1	0	0	NA
CIRMBP-1256	0	1	1	0	0	NA
CIRMBP-1257	0	1	1	0	0	NA
CIRMBP-1258	0	1	1	0	0	NA
CIRMBP-1259	0	1	1	0	0	NA
CIRMBP-1260	0	1	1	0	0	0
CIRMBP-1261	0	1	1	0	0	0
CIRMBP-1262	0	1	1	0	0	NA
CIRMBP-1263	0	1	1	0	0	NA
CIRMBP-1264	0	1	1	0	0	NA
CIRMBP-1265	0	1	1	0	0	NA
CIRMBP-1266	0	1	1	0	0	NA
CIRMBP-1267	0	1	1	0	0	NA
CIRMBP-1268	0	1	0	1	1	NA
CIRMBP-1269	0	1	1	0	0	NA
CIRMBP-1270	0	1	1	0	0	NA
CIRMBP-1271	0	1	1	0	0	NA
CIRMBP-1272	0	1	1	0	0	NA
CIRMBP-1273	0	1	1	0	0	NA
CIRMBP-1274	0	1	1	0	0	NA
CIRMBP-1275	0	1	0	1	1	NA
CIRMBP-1276	0	1	1	0	0	NA
CIRMBP-1277	0	1	1	0	0	NA
CIRMBP-1278	0	1	1	0	0	NA
CIRMBP-1279	0	1	1	0	0	NA
CIRMBP-1280	0	1	1	0	0	NA
CIRMBP-1281	0	1	1	0	0	NA
CIRMBP-1282	0	1	1	0	0	NA
CIRMBP-1283	0	1	1	0	0	NA
CIRMBP-1284	0	1	1	0	0	NA
CIRMBP-1285	0	1	0	1	1	NA
CIRMBP-1286	0	1	0	1	1	NA
CIRMBP-1287	0	1	1	0	0	NA
CIRMBP-1288	0	1	1	0	0	NA
CIRMBP-1289	0	1	1	0	0	NA
CIRMBP-1290	0	1	1	0	0	NA
CIRMBP-1291	0	1	1	0	0	NA
CIRMBP-1292	0	1	0	1	1	NA
CIRMBP-1293	0	1	1	0	0	NA
CIRMBP-1294	0	1	1	0	0	NA
CIRMBP-1295	0	1	0	1	1	NA
CIRMBP-1296	0	1	0	1	1	NA
CIRMBP-1297	0	1	1	0	0	NA
CIRMBP-1298	0	1	1	0	0	NA
CIRMBP-1299	0	1	1	0	0	NA
CIRMBP-1300	0	1	1	0	0	NA
CIRMBP-1301	0	1	1	0	0	NA
CIRMBP-1302	0	1	1	0	0	NA
CIRMBP-1303	0	1	1	0	0	NA
CIRMBP-1304	0	1	1	0	0	NA
CL-1	0	1	0	1	1	NA
D-104	0	0	0	1	NA	NA
DSM20682a	1	0	0	0	NA	NA
DSM20682b	1	0	0	0	NA	NA
E1062	1	0	0	0	NA	NA
ERR3414584	1	0	0	0	NA	NA
ESM13AIC1	1	0	0	0	NA	NA
ESM13C1	1	0	0	0	NA	NA
ESM877AIC1	1	0	0	0	NA	NA
G-29	0	0	0	1	NA	NA
LB5753	0	1	0	1	NA	NA
LB5754	0	1	0	1	NA	NA
LB5756	0	1	0	1	NA	NA
LB5759	0	1	0	1	NA	NA
LB5800	0	1	0	1	1	NA
LB5836	0	1	1	0	0	NA
LB5840	0	1	0	1	NA	NA
LB5843	0	1	1	0	0	NA
LB5856	0	1	0	1	1	NA
LB5857	1	0	0	0	NA	NA
LB5860	1	0	0	0	NA	NA
LB5864	0	1	0	1	NA	NA
LB5872	0	1	0	1	NA	NA
LB5876	1	0	0	0	NA	NA
LB5880	1	0	0	0	NA	NA
LB5916	1	0	0	0	NA	NA
LB5922	1	0	0	0	NA	NA
LB5923	1	0	0	0	NA	NA
LB5924	0	1	1	0	0	NA
LB5925	0	1	1	0	0	NA
LB5926	1	0	0	0	NA	NA
LB5927	1	0	0	0	NA	NA
LBV_466	1	0	0	0	NA	NA
mag_170	1	0	0	0	NA	NA
NCTC12421	1	0	0	0	NA	NA
NCTC12422	1	0	0	0	NA	NA
PS1	1	0	0	0	NA	NA
PS10	1	0	0	0	NA	NA
PS11	1	0	0	0	NA	NA
PS2	1	0	0	0	NA	NA
PS3	1	0	0	0	NA	NA
PS5	1	0	0	0	NA	NA
PS6	1	0	0	0	NA	NA
PS7	1	0	0	0	NA	NA
PS8	1	0	0	0	NA	NA
SA1	0	1	1	0	0	NA
SA2	0	1	1	0	0	NA
SA3	0	1	1	0	0	NA
WCA-380	1	0	0	0	NA	NA

## Sheet: Table S2
Table S2. BLASTp results for the 227 genomes queried with the 12 encoded polypeptides (peg 312 to 323) from the capsular cluster identified by Borst [13]. For each strain the phenotypic group is indicated as 0-not in group; 1- in group, and the BLASTp result is (pid * qcov)/100. Minimum, maximuim and average for 0/1 for the phenotypic group is summarized at the bottom.
	Phenotype group			Protein Encoding Gene number
Strain	Chicken Disease	BCO	sepsis strict	312	313	314	315	316	317	318	319	320	321	322	323	Avg pid*qcov
1415	1	1	0	100	100	100	100	100	99.676	100	100	100	100	99.749	100	99.9521
1552	0	0	0	29.1177	0	0	25.3302	0	17.6571	0	0	0	0	0	78.1001	12.5171
1675	1	1	0	100	100	100	100	100	100	100	100	100	100	100	100	100
1749	1	0	1	33.1313	17.6667	0	24.8136	0	17.6571	0	0	0	0	13.248	78.1001	15.3847
1750	1	0	1	100	100	100	100	100	100	100	100	100	100	100	100	100
1751	0	0	0	100	100	100	100	100	99.676	100	100	100	100	99.749	100	99.9521
1752	1	0	1	39.8045	0	0	19.8263	0	18.1548	0	0	29.3152	0	0	97.111	17.0176
1753	1	0	1	100	100	100	100	100	99.676	100	100	100	100	99.749	100	99.9521
1754	0	0	0	100	100	100	100	100	100	100	100	100	100	100	100	100
1755	1	0	1	100	100	100	100	100	99.676	100	100	100	100	99.749	100	99.9521
1756	1	0	1	100	100	100	100	100	99.676	100	100	100	100	99.749	100	99.9521
1757	1	0	1	100	100	100	100	100	99.676	100	100	100	100	99.749	100	99.9521
1758	1	0	1	100	100	100	100	100	99.676	100	100	100	100	99.749	100	99.9521
100AEA1	0	0	0	34.0149	0	12.1765	20.6815	0	17.6571	0	0	0	27.6994	0	77.8803	15.8425
108EA1	0	0	0	31.8054	0	0	24.1239	0	17.6571	0	0	0	0	0	77.8803	12.6222
1212-11909	0	0	0	100	100	100	100	100	99.676	100	100	100	100	100	100	99.973
170AEA1	0	0	0	0	18.0003	0	24.8136	0	17.6571	0	0	0	0	0	77.8803	11.5293
1710s23	0	0	0	39.8045	0	0	19.8263	0	17.8522	0	0	29.3152	0	0	78.1001	15.4082
1711s24	0	0	0	39.8045	0	0	19.8263	0	17.8522	0	0	29.3152	0	0	78.1001	15.4082
197EA2	0	0	0	31.8054	0	0	24.1239	0	17.6571	0	0	0	0	0	78.1001	12.6405
215EA1	0	0	0	33.1313	0	0	24.1239	0	17.6571	0	0	0	0	0	78.1001	12.751
2D5_DIV0622	0	0	0	58.7733	0	0	24.8136	0	17.8522	0	0	76.128	76.6933	80.151	98.222	36.0528
An144	0	0	0	35.7812	0	0	25.3302	0	17.6571	0	0	0	0	0	78.1001	13.0724
An483	0	0	0	32.689	0	0	20.6613	0	17.6571	0	0	0	0	0	78.1001	12.4256
An69	0	0	0	32.689	0	0	25.3302	0	17.6571	0	0	0	0	0	78.1001	12.8147
ARS16	0	0	0	32.689	0	0	24.8136	0	17.5496	0	0	0	0	0	78.1001	12.7627
ARS48	0	0	0	42.18	0	10.7685	24.5043	0	17.5496	0	0	92.3315	95.42	96.482	97.778	39.7512
ARS57	0	0	0	32.689	0	0	24.5043	0	17.8522	0	0	0	0	0	78.1001	12.7621
ARS60	0	0	0	41.4087	0	15.7376	24.5043	0	18.4574	0	0	29.0408	0	0	99.556	19.0587
ARS62	0	0	0	32.689	0	0	24.8136	0	17.5496	0	0	0	0	0	78.1001	12.7627
ARS64	0	0	0	0	0	0	24.5043	0	17.5496	0	0	0	0	0	78.1001	10.0128
ARS65	0	0	0	32.689	0	15.8868	24.8136	19.5968	17.5496	0	0	0	0	0	77.8803	15.7013
ARS71	0	0	0	58.0099	0	41.6839	60.5581	26.9752	17.5496	0	0	75.1445	76.6933	80.151	98.667	44.6194
ARS9	0	0	0	33.1313	0	0	24.8136	0	17.6571	0	0	0	25.5192	0	78.1001	14.9351
AS21	0	0	0	0	0	0	24.8136	0	17.9564	0	0	0	0	0	48.9723	7.64519
ATCC43198a	0	0	0	41.486	0	15.7376	25.3302	0	18.1548	0	0	29.3152	0	0	98.444	19.039
ATCC43198b	0	0	0	41.486	0	15.7376	25.3302	0	18.1548	0	0	29.3152	0	0	98.444	19.039
B05581	0	0	0	31.1081	0	9.68448	23.6106	0	17.8522	27.8061	0	28.4316	10.75	0	97.111	20.5295
BB-66	0	0	0	100	100	100	100	100	99.676	100	100	100	100	100	100	99.973
BRZ_PB__bin29	0	0	0	0	17.6667	0	24.2969	0	17.9564	0	0	0	0	0	78.1001	11.5017
CB-32	0	0	0	100	100	100	100	99.747	99.676	100	100	100	100	99.749	100	99.931
CE1	0	0	0	42.654	17.6667	10.7685	24.8136	0	17.6571	0	0	92.3315	98.982	99.497	98.444	41.9012
CE2	0	0	0	42.654	17.6667	0	24.8136	0	17.6571	0	0	28.7052	0	0	98.444	19.1617
CE3	0	0	0	37.2913	0	0	24.8136	0	17.6571	0	0	29.3152	0	0	98.222	17.2749
CHD112EN	1	1	0	34.4562	0	12.1765	20.6815	0	17.8522	0	0	0	25.8603	0	78.1001	15.7606
CHD121EN	1	1	0	96.6319	100	85.1787	99.465	0	12.0229	0	0	100	100	0	100	57.7749
CHD139EN	1	1	0	85.5218	100	38.7235	24.5043	0	29	0	25	99.721	100	0	100	50.2059
CHD140EN	1	1	0	43.0432	0	41.6839	60.5581	0	11.6316	0	0	75.1445	76.6933	80.151	98.667	40.6311
CHD141EN	1	1	0	100	100	100	100	66	99.676	0	100	100	100	99.749	98.7792	88.6837
CHD158EN	1	1	0	33.1313	0	0	24.8136	0	17.6571	0	0	0	8.07212	0	78.1001	13.4812
CHD161EN	1	1	0	0	0	0	24.8136	0	17.6571	0	0	0	25.5192	0	78.1001	12.1742
CHD182EN	0	0	0	33.5726	0	12.1928	20.6815	0	17.6571	0	0	0	27.5512	0	98	17.4713
CHD192EN	0	0	0	34.0149	0	12.1765	20.6815	0	17.6571	0	0	0	27.6994	0	78.1001	15.8608
CHD1EN	0	0	0	32.689	0	0	25.3302	0	18.1548	0	0	0	0	0	96.444	14.3848
CHD222EN	0	0	0	85.5218	100	99.725	100	0	61	0	0	89.721	100	100	100	69.664
CHD259EN	0	0	0	33.1313	17.6667	0	24.8136	0	17.6571	0	0	0	0	0	95.2162	15.7071
CHD261EN	1	1	0	34.0149	0	12.1765	16.4895	0	17.6571	0	0	0	27.6994	0	78.1001	15.5115
CHD263EN	1	1	0	33.1313	0	0	24.8136	0	17.6571	0	0	0	25.2718	0	78.1001	14.9145
CHD265EN	1	1	0	34.0149	0	12.9086	20.6815	0	17.6571	0	0	0	20.0119	0	78.1001	15.2812
CHD26EN	0	0	0	0	0	0	25.3302	0	18.1548	0	0	0	0	0	96.444	11.6608
CHD270EN	1	1	0	33.5726	0	12.1928	20.6815	0	17.6571	0	0	0	27.5512	0	98	17.4713
CHD278EN	1	1	0	100	100	46	100	0	17.8522	71.7883	69.748	100	100	99.749	100	75.4281
CHD285EN	1	1	0	34.0149	17.6667	12.1765	20.6815	0	17.6571	0	0	0	27.6994	0	78.1001	17.333
CHD288EN	1	1	0	34.0149	17.6667	12.1765	20.6815	0	17.6571	0	0	0	27.6994	0	78.1001	17.333
CHD293EN	1	1	0	33.5726	0	12.1928	20.6815	0	17.6571	0	0	0	27.5512	0	98	17.4713
CHD319EN	1	1	0	100	100	100	100	100	100	100	100	100	100	100	100	100
CHD341EN	1	1	0	33.5726	0	12.1928	20.6815	0	17.6571	0	0	0	27.5512	0	98	17.4713
CHD347EN	1	1	0	100	100	100	100	100	100	100	100	100	100	99.749	100	99.9791
CHD37EN	0	0	0	33.1313	0	0	24.8136	0	17.6571	0	0	0	0	0	78.1001	12.8085
CHD49EN	0	0	0	32.689	0	0	24.8136	0	17.6571	0	0	0	0	0	78.1001	12.7716
CHD62EN	0	0	0	32.689	0	0	24.8136	0	18.2557	0	0	0	0	0	95.2162	14.2479
CHD78EN	0	0	0	0	0	0	24.8136	0	17.6571	0	0	0	0	0	97.778	11.6874
CHD83EN	0	0	0	42.4284	0	21.806	24.8136	0	17.5496	0	0	28.4316	0	0	98.222	19.4376
CHD94EN	0	0	0	47	100	100	100	0	33.6763	0	0	100	100	0	100	56.723
CHD96EN	0	0	0	0	0	7.90911	10.5883	0	0	0	0	0	0	0	78.1001	8.0498
CIRMBP-1195	0	0	0	100	100	100	100	100	99.353	100	100	100	100	100	100	99.9461
CIRMBP-1196	0	0	0	100	100	100	100	100	99.676	100	100	100	100	100	100	99.973
CIRMBP-1197	0	0	0	31.8054	0	0	24.1239	0	17.9564	0	0	0	10.75	0	77.8803	13.543
CIRMBP-1205	1	1	0	100	100	100	100	100	99.676	100	100	100	100	100	100	99.973
CIRMBP-1206	1	1	0	100	100	100	100	100	99.676	99.789	100	100	100	100	100	99.9554
CIRMBP-1207	1	1	0	100	100	100	100	100	99.676	100	100	100	100	99.749	100	99.9521
CIRMBP-1208	1	1	0	100	100	100	100	100	99.676	100	100	100	100	100	100	99.973
CIRMBP-1209	1	1	0	100	100	100	100	100	99.676	99.789	100	100	100	100	100	99.9554
CIRMBP-1210	1	1	0	32.689	0	0	24.8136	0	17.6571	0	0	0	0	0	98	14.43
CIRMBP-1211	1	0	1	100	100	100	100	100	99.676	99.789	100	100	100	100	100	99.9554
CIRMBP-1212	1	1	0	100	100	100	100	100	99.676	100	100	100	100	99.749	100	99.9521
CIRMBP-1213	1	1	0	100	100	100	100	100	99.676	100	100	100	100	100	100	99.973
CIRMBP-1214	1	1	0	100	100	100	100	100	99.676	100	100	100	100	99.749	100	99.9521
CIRMBP-1215	1	1	0	100	100	100	100	100	99.676	100	100	100	100	100	100	99.973
CIRMBP-1216	1	1	0	100	100	100	100	100	99.676	100	100	100	100	100	100	99.973
CIRMBP-1217	1	1	0	100	100	100	100	100	99.676	100	100	100	100	100	100	99.973
CIRMBP-1218	1	0	1	100	100	100	100	100	99.676	99.789	100	100	100	100	99.778	99.9369
CIRMBP-1219	1	0	1	100	100	100	100	100	99.676	100	100	100	100	100	100	99.973
CIRMBP-1220	1	1	0	42.18	0	10.7685	23.3038	0	17.8522	0	0	92.3315	95.42	96.482	97.778	39.6763
CIRMBP-1221	1	1	0	100	100	100	100	100	99.676	100	100	100	100	100	100	99.973
CIRMBP-1222	1	1	0	100	100	100	100	100	99.676	100	100	100	100	100	100	99.973
CIRMBP-1223	1	1	0	100	100	100	100	100	99.676	100	100	100	100	100	100	99.973
CIRMBP-1224	1	1	0	100	100	87.7246	100	100	99.676	100	100	100	100	100	100	98.95
CIRMBP-1225	1	1	0	100	100	100	100	100	99.676	100	100	100	100	100	100	99.973
CIRMBP-1226	1	1	0	100	100	100	100	100	99.676	100	100	100	100	100	100	99.973
CIRMBP-1227	1	1	0	100	100	100	100	100	99.676	100	100	100	100	100	100	99.973
CIRMBP-1228	1	1	0	100	100	100	100	100	99.676	100	100	100	100	100	100	99.973
CIRMBP-1229	1	1	1	100	100	100	100	100	99.676	100	100	100	100	100	100	99.973
CIRMBP-1230	1	1	0	100	100	100	100	100	99.676	100	100	100	100	100	100	99.973
CIRMBP-1231	1	1	0	58.0099	0	41.6839	60.5581	26.9752	17.8522	0	0	75.1445	77.1398	80.151	97.333	44.5706
CIRMBP-1232	1	1	0	100	100	100	100	100	99.676	100	100	100	100	100	100	99.973
CIRMBP-1233	1	1	0	100	100	100	100	100	99.676	100	100	100	100	100	100	99.973
CIRMBP-1234	1	1	0	100	100	100	100	100	99.676	100	100	100	100	99.749	100	99.9521
CIRMBP-1235	1	1	0	100	100	100	100	100	99.676	100	100	100	100	100	100	99.973
CIRMBP-1236	1	1	0	100	100	100	100	100	99.676	71.7883	100	100	100	100	100	97.622
CIRMBP-1237	1	1	0	100	100	100	100	100	99.676	100	100	100	100	100	100	99.973
CIRMBP-1238	1	0	1	100	100	100	100	100	99.676	100	100	100	100	99.749	100	99.9521
CIRMBP-1239	1	1	0	100	100	100	100	100	99.676	100	100	100	100	100	100	99.973
CIRMBP-1240	1	1	0	100	100	100	100	100	99.676	100	100	100	100	100	100	99.973
CIRMBP-1241	1	1	0	35.1067	0	0	25.3302	0	17.8522	0	0	29.3152	0	0	97.556	17.0967
CIRMBP-1242	1	1	0	35.1067	0	0	25.3302	0	17.8522	0	0	29.3152	0	0	97.556	17.0967
CIRMBP-1243	1	1	0	100	100	100	100	100	99.676	100	100	100	100	99.749	97.778	99.7669
CIRMBP-1244	1	1	0	100	100	100	100	100	99.676	100	100	100	100	100	100	99.973
CIRMBP-1245	1	1	0	100	100	100	100	100	99.676	100	100	100	100	99.749	97.778	99.7669
CIRMBP-1246	1	1	0	58.0099	0	41.6839	60.5581	26.9752	17.8522	0	0	75.1445	77.1398	80.151	97.333	44.5706
CIRMBP-1247	1	0	1	100	100	100	100	100	99.676	100	100	100	100	99.749	100	99.9521
CIRMBP-1248	1	1	0	100	100	100	100	100	99.676	100	100	100	100	100	100	99.973
CIRMBP-1249	1	1	0	100	100	100	100	100	99.676	100	100	99.721	100	100	100	99.9497
CIRMBP-1250	1	1	0	100	100	100	100	100	99.676	100	100	100	100	100	100	99.973
CIRMBP-1251	1	0	1	100	100	100	100	100	99.676	100	100	100	100	99.749	97.778	99.7669
CIRMBP-1252	1	1	0	100	100	100	100	100	99.676	100	100	100	100	100	100	99.973
CIRMBP-1253	1	1	0	100	100	100	100	100	99.676	100	100	100	100	99.749	100	99.9521
CIRMBP-1254	1	1	0	31.8054	0	0	25.3302	0	17.8522	0	0	0	0	0	78.1001	12.7573
CIRMBP-1255	1	1	0	100	100	100	100	100	99.676	100	100	100	100	100	100	99.973
CIRMBP-1256	1	1	0	42.18	0	10.7685	25.3302	0	17.8522	0	0	92.0533	95.42	96.482	97.778	39.822
CIRMBP-1257	1	1	0	32.689	0	0	24.8136	0	17.6571	0	0	0	0	0	96.667	14.3189
CIRMBP-1258	1	1	0	58.0099	0	41.6839	60.5581	26.9752	17.8522	0	0	75.1445	77.1398	80.151	97.333	44.5706
CIRMBP-1259	1	1	0	58.0099	0	41.6839	60.5581	26.9752	17.8522	0	0	75.1445	77.1398	80.151	97.333	44.5706
CIRMBP-1260	1	1	0	100	100	100	100	100	99.676	100	100	99.721	100	100	100	99.9497
CIRMBP-1261	1	1	0	100	100	99.725	100	100	99.676	100	100	100	100	100	100	99.9501
CIRMBP-1262	1	1	0	100	100	100	100	100	99.676	100	100	100	100	100	100	99.973
CIRMBP-1263	1	1	0	100	100	100	100	100	99.676	100	100	100	100	99.749	97.778	99.7669
CIRMBP-1264	1	1	0	31.8054	0	0	25.3302	0	17.8522	0	0	0	0	0	78.1001	12.7573
CIRMBP-1265	1	1	0	100	100	100	100	100	99.676	100	100	100	100	100	100	99.973
CIRMBP-1266	1	1	0	100	100	100	100	100	99.676	100	100	100	100	100	100	99.973
CIRMBP-1267	1	1	0	100	100	100	100	100	99.676	100	100	100	100	100	100	99.973
CIRMBP-1268	1	0	1	58.0099	0	41.6839	61.0935	26.9752	17.8522	0	0	89.8405	94.911	98.995	97.111	48.8727
CIRMBP-1269	1	1	0	58.0099	0	41.6839	60.5581	26.9752	17.8522	0	0	75.1445	77.1398	80.151	97.333	44.5706
CIRMBP-1270	1	1	0	100	100	100	100	100	99.676	100	100	100	100	100	100	99.973
CIRMBP-1271	1	1	0	100	100	100	100	100	99.676	100	100	100	100	100	100	99.973
CIRMBP-1272	1	1	0	100	100	100	100	100	99.676	100	100	100	100	100	100	99.973
CIRMBP-1273	1	1	0	100	100	100	100	100	99.676	100	100	100	100	100	100	99.973
CIRMBP-1274	1	1	0	100	100	100	100	100	99.676	100	100	100	100	100	100	99.973
CIRMBP-1275	1	0	1	100	99.655	100	100	100	99.676	100	100	100	100	99.749	100	99.9233
CIRMBP-1276	1	1	0	100	100	100	100	100	99.676	100	100	100	100	100	100	99.973
CIRMBP-1277	1	1	0	32.689	17.6667	0	24.2969	0	17.6571	0	0	0	0	0	96.667	15.7481
CIRMBP-1278	1	1	0	100	100	100	100	100	99.676	100	100	100	100	100	100	99.973
CIRMBP-1279	1	1	0	100	100	100	100	100	99.676	100	100	100	100	100	100	99.973
CIRMBP-1280	1	1	0	100	100	100	100	100	99.676	100	100	100	100	100	100	99.973
CIRMBP-1281	1	1	0	100	100	100	100	100	99.676	100	100	100	100	100	100	99.973
CIRMBP-1282	1	1	0	100	100	100	100	100	99.676	100	100	100	100	99.749	100	99.9521
CIRMBP-1283	1	1	0	100	100	100	99.465	100	99.676	100	100	100	100	100	100	99.9284
CIRMBP-1284	1	1	0	100	100	100	100	100	99.676	100	100	100	100	100	100	99.973
CIRMBP-1285	1	0	1	100	100	100	100	100	99.676	100	100	99.721	100	100	100	99.9497
CIRMBP-1286	1	0	1	58.4852	0	41.6839	61.0935	26.9752	18.4574	0	0	89.8405	94.911	98.995	96.889	48.9442
CIRMBP-1287	1	1	0	100	100	100	100	100	99.676	100	100	100	100	99.749	100	99.9521
CIRMBP-1288	1	1	0	100	100	100	100	100	99.676	100	100	100	100	99.749	100	99.9521
CIRMBP-1289	1	1	0	100	100	100	100	100	99.676	100	100	100	100	100	100	99.973
CIRMBP-1290	1	1	0	100	100	100	100	100	99.676	99.789	100	100	100	100	100	99.9554
CIRMBP-1291	1	1	0	100	100	100	100	100	99.676	100	100	100	100	99.749	97.778	99.7669
CIRMBP-1292	1	0	1	39.8045	0	0	19.8263	0	17.6571	0	0	29.3152	0	0	77.8803	15.3736
CIRMBP-1293	1	1	0	100	100	100	100	100	99.676	100	100	100	100	100	100	99.973
CIRMBP-1294	1	1	0	34.4562	17.6667	0	25.3302	0	17.6571	0	0	0	0	0	97.333	16.0369
CIRMBP-1295	1	0	1	100	100	100	100	100	99.676	100	100	100	100	99.749	100	99.9521
CIRMBP-1296	1	0	1	100	100	100	100	100	100	100	100	100	100	100	99.778	99.9815
CIRMBP-1297	1	1	0	100	100	100	100	100	99.676	99.789	100	100	100	99.749	100	99.9345
CIRMBP-1298	1	1	0	31.8054	0	0	25.3302	0	17.8522	0	0	0	0	0	78.1001	12.7573
CIRMBP-1299	1	1	0	100	100	100	100	100	99.676	100	100	100	100	100	100	99.973
CIRMBP-1300	1	1	0	100	100	100	100	100	99.676	99.789	100	100	100	99.749	100	99.9345
CIRMBP-1301	1	1	0	100	100	100	100	100	99.676	100	100	100	100	100	100	99.973
CIRMBP-1302	1	1	0	100	100	100	100	100	99.676	100	100	100	100	99.749	100	99.9521
CIRMBP-1303	1	1	0	100	100	100	100	100	99.676	100	100	100	100	99.749	97.778	99.7669
CIRMBP-1304	1	1	0	100	100	100	100	100	99.676	100	100	100	100	99.749	100	99.9521
CL-1	1	0	1	100	100	100	100	100	99.676	100	100	100	100	100	100	99.973
D-104	0	0	1	100	100	100	100	100	99.676	100	100	100	100	99.749	100	99.9521
DSM20682a	0	0	0	41.486	0	15.7376	25.3302	0	18.1548	0	0	29.3152	0	0	98.444	19.039
DSM20682b	0	0	0	41.486	0	15.7376	25.3302	0	18.1548	0	0	29.3152	0	0	98.444	19.039
E1062	0	0	0	33.1313	0	0	24.8136	0	17.5496	0	14.9442	19.8132	0	0	78.1001	15.696
ERR3414584	0	0	0	0	0	0	24.2969	0	17.6571	0	0	0	0	0	78.1001	10.0045
ESM13AIC1	0	0	0	33.1313	18.0003	0	25.3302	0	17.6571	0	0	10.9091	10.8737	0	94.9931	17.5746
ESM13C1	0	0	0	33.1313	18.0003	0	25.3302	0	17.6571	0	0	10.9091	10.8737	0	94.9931	17.5746
ESM877AIC1	0	0	0	32.689	0	10.0082	24.1239	0	17.9564	0	0	0	10.75	0	78.1001	14.469
G-29	0	0	1	32.689	17.6667	13.515	24.8136	0	17.6571	0	0	0	0	0	78.1001	15.3701
LB5753	1	0	1	100	100	100	100	100	99.676	100	100	100	100	99.749	100	99.9521
LB5754	1	0	1	100	100	100	100	100	99.676	100	100	100	100	99.749	100	99.9521
LB5756	1	0	1	100	100	100	100	100	99.676	100	100	100	100	99.749	100	99.9521
LB5759	1	0	1	100	100	100	100	100	99.676	100	100	100	100	99.749	100	99.9521
LB5800	1	0	1	100	100	100	100	100	100	100	100	100	100	100	100	100
LB5836	1	1	0	100	100	100	100	100	100	100	100	100	100	100	100	100
LB5840	1	0	1	100	100	100	100	100	99.676	100	100	100	100	99.749	100	99.9521
LB5843	1	1	0	100	100	100	100	100	100	100	100	100	100	100	100	100
LB5856	1	0	1	42.654	0	10.7685	24.8136	0	17.5496	0	0	93.4435	96.692	96.482	98.667	40.0892
LB5857	0	0	0	100	100	100	100	100	100	100	100	100	100	100	100	100
LB5860	0	0	0	100	100	100	100	100	100	100	100	100	100	100	100	100
LB5864	1	0	1	100	100	100	100	100	99.676	100	100	100	100	99.749	99.778	99.9336
LB5872	1	0	1	100	100	100	100	100	99.676	100	100	100	100	99.749	100	99.9521
LB5876	0	0	0	100	100	100	100	100	100	100	100	100	100	100	100	100
LB5880	0	0	0	100	100	100	100	100	100	100	100	100	100	100	100	100
LB5916	0	0	0	100	100	100	100	100	100	100	100	100	100	100	100	100
LB5922	0	0	0	100	100	100	100	100	100	100	100	100	97.964	96.482	98.444	99.4075
LB5923	0	0	0	100	100	100	100	100	100	100	100	100	100	100	100	100
LB5924	1	1	0	100	100	100	100	100	99.676	100	100	100	100	99.749	100	99.9521
LB5925	1	1	0	100	100	100	25.3302	100	99.676	100	100	100	100	99.749	100	93.7296
LB5926	0	0	0	100	100	100	100	100	100	100	100	100	100	100	100	100
LB5927	0	0	0	100	100	100	100	66	100	100	100	100	100	100	100	97.1667
LBV_466	0	0	0	99.524	98.966	77.122	31.5344	71.357	94.498	99.577	100	99.721	100	99.749	100	89.3374
mag_170	0	0	0	42.4284	0	21.806	24.2969	0	17.6571	0	0	29.3152	0	0	98.667	19.5142
NCTC12421	0	0	0	41.486	0	15.7376	25.3302	0	18.1548	0	0	29.3152	0	0	98.444	19.039
NCTC12422	0	0	0	42.18	0	10.7685	23.3038	0	18.1548	0	0	92.3315	95.42	96.482	97.556	39.6831
PS1	0	0	0	33.1313	0	0	24.8136	0	17.6571	0	0	0	25.5192	0	98	16.5934
PS10	0	0	0	42.18	0	10.7685	24.5043	0	18.4574	0	0	92.3315	95.42	96.482	78.1001	38.187
PS11	0	0	0	100	100	100	100	100	100	100	100	100	100	100	100	100
PS2	0	0	0	100	100	100	100	99.747	99.676	100	100	100	100	99.749	99.556	99.894
PS3	0	0	0	100	100	100	100	100	100	100	100	100	100	100	100	100
PS5	0	0	0	100	100	100	100	100	100	100	99.749	100	100	100	100	99.9791
PS6	0	0	0	100	100	100	100	100	100	100	100	100	100	100	100	100
PS7	0	0	0	42.18	0	10.7685	25.3302	0	18.1548	0	0	92.3315	95.42	96.482	78.1001	38.2306
PS8	0	0	0	100	100	100	100	100	100	100	100	100	100	100	100	100
SA1	1	1	0	100	100	100	100	100	100	100	100	100	100	100	100	100
SA2	1	1	0	100	100	100	100	100	100	100	100	100	100	100	100	100
SA3	1	1	0	100	100	100	100	100	100	100	100	100	100	100	100	100
WCA-380	0	0	0	99.524	99.31	98.077	98.396	99.494	99.676	98.943	99.749	100	97.964	97.487	98.444	98.922
Summaries
min			0	0	0	0	10.5883	0	0	0	0	0	0	0	48.9723
min			1	32.689	0	0	19.8263	0	17.5496	0	0	0	0	0	77.8803
min		0		0	0	0	10.5883	0	0	0	0	0	0	0	48.9723
min		1		0	0	0	16.4895	0	11.6316	0	0	0	0	0	78.1001
min	0			0	0	0	10.5883	0	0	0	0	0	0	0	48.9723
min	1			0	0	0	16.4895	0	11.6316	0	0	0	0	0	77.8803
max			0	100	100	100	100	100	100	100	100	100	100	100	100
max			1	100	100	100	100	100	100	100	100	100	100	100	100
max		0		100	100	100	100	100	100	100	100	100	100	100	100
max		1		100	100	100	100	100	100	100	100	100	100	100	100
max	0			100	100	100	100	100	100	100	100	100	100	100	100
max	1			100	100	100	100	100	100	100	100	100	100	100	100
avg			0	71.3637	58.5161	60.185	67.7962	55.3564	62.9839	54.7609	55.488	66.4015	66.5372	62.7295	94.6982
avg			1	88.37	80.4408	82.578	86.3612	80.9985	82.8591	79.3994	79.4118	89.1611	87.8386	88.3295	97.6756
avg		0		63.2082	47.4153	49.5237	59.2796	44.574	54.4036	44.477	44.3756	57.9993	55.7918	53.4681	92.8521
avg		1		84.5198	76.0585	77.4315	81.775	73.6919	77.4165	72.3028	73.6381	81.5179	83.5414	79.5447	97.4161
avg	0			53.3004	34.6416	36.6102	48.6236	30.2795	43.2611	30.8089	30.6639	45.3957	42.902	39.4932	90.8465
avg	1			85.5665	77.1585	78.7677	82.9919	75.5505	78.7978	74.0834	75.1362	83.6174	84.8982	81.8728	97.5745

## Sheet: Table S3
Table S3. Scoary output for gene presence-absence for phenotypic trait Chicken Disease. Positive/Negative are the counts for genomes where the gene is present or absent. Sensitivity reflects the discriminatory power of the locus while Specificity relects how specific that locus is to the trait. Odds ratio is the likelihood the locus contributes to the trait, and Bonferrroni P-value is the correct…
										Start
Locus		Positive		Negative		Sensi-tivity	Speci-ficity	Odds ratio	Bonferroni P-value	BCO			Cecal			EC
Annotation	Gene	present	absent	present	absent					SA1	CIRMBP-1274	CIRMBP-1228	CE1	CE2	CE3	number
Glycine cleavage system H protein	gcvH	97	48	23	59	66.8966	71.9512	5.18388	0.000285272	12493	294525	360587	12944	12556
hypothetical protein		97	48	22	60	66.8966	73.1707	5.51136	0.000116021	58900	302582	368658
PTS system mannose-specific EIIAB component	manX_4	127	18	35	47	87.5862	57.3171	9.4746	2.49937e-08	117017	357194	402712				2.7.1.191
hypothetical protein		124	21	26	56	85.5172	68.2927	12.7179	5.11043e-12	132012	372152	417670
hypothetical protein		126	19	40	42	86.8966	51.2195	6.96316	1.50232e-05	235304	468900	515389	181213	177567
Putative glutamine amidotransferase		131	14	49	33	90.3448	40.2439	6.30175	0.00160932	236683	470279	516768	182640	178943		2.4.2.-
Lipoate-protein ligase LplJ	lplJ_1	129	16	32	50	88.9655	60.9756	12.5977	4.67789e-11	239437	472904	519393				6.3.1.20
Lichenan permease IIC component	licC_1	139	6	57	25	95.8621	30.4878	10.1608	0.000890916	261960	495431	541920	206077	202156	206320
hypothetical protein		140	5	58	24	96.5517	29.2683	11.5862	0.000681693	263289	496760	543249	207406	203486	207649
hypothetical protein		137	8	55	27	94.4828	32.9268	8.40682	0.00164153	263952	497423	543912	208069	204149	208312
UDP-glucose 6-dehydrogenase	ugd	122	23	36	46	84.1379	56.0976	6.77778	8.21803e-06	268473	501913	548402				1.1.1.22
dTDP-glucose 4,6-dehydratase	rfbB	122	23	37	45	84.1379	54.878	6.45123	2.12789e-05	269959	503399	549888				4.2.1.46
Undecaprenyl phosphate N,N'-diacetylbacillosamine 1-phosphate transferase	pglC	111	34	27	55	76.5517	67.0732	6.65033	2.56377e-06	273857	507297	553786				2.7.8.36
N-acetyl-alpha-D-glucosaminyl-diphospho-ditrans,octacis-undecaprenol 4-epimerase	gnu	111	34	27	55	76.5517	67.0732	6.65033	2.56377e-06	274486	507926	554415				5.1.3.26
N,N'-diacetylbacillosaminyl-diphospho-undecaprenol alpha-1,3-N-acetylgalactosaminyltransferase	pglA	111	34	26	56	76.5517	68.2927	7.03167	5.45158e-07	275355	508795	555284				2.4.1.290
UDP-3-O-(3-hydroxymyristoyl)glucosamine N-acyltransferase	lpxD	109	36	26	56	75.1724	68.2927	6.52137	3.42677e-06	276475	509915	556404				2.3.1.191
hypothetical protein		108	37	24	58	74.4828	70.7317	7.05405	6.14993e-07	277301	510741	557230
General stress protein A	gspA_1	109	36	26	56	75.1724	68.2927	6.52137	3.42677e-06	278493	511933	558422
hypothetical protein		106	39	25	57	73.1034	69.5122	6.19692	6.53167e-06	279446	512886	559375
hypothetical protein		110	35	25	57	75.8621	69.5122	7.16571	4.65775e-07	280901	514341	560830
UDP-glucose 4-epimerase	capD	116	29	32	50	80	60.9756	6.25	1.52355e-05	282137	515577	562066	236413			5.1.3.2
UDP-N-acetylglucosamine 2-epimerase	mnaA	116	29	32	50	80	60.9756	6.25	1.52355e-05	283228	516668	563157	237453			5.1.3.14
UDP-2-acetamido-2,6-beta-L-arabino-hexul-4-ose reductase	wbjC	114	31	31	51	78.6207	62.1951	6.04995	2.25734e-05	284414	517854	564343	238639			1.1.1.367
hypothetical protein		70	75	10	72	48.2759	87.8049	6.72	0.000298084	288699	524418	568628
hypothetical protein		69	76	8	74	47.5862	90.2439	8.39803	3.12545e-05	289318	525037	569247
hypothetical protein		96	49	19	63	66.2069	76.8293	6.49624	4.53396e-06	302865	540986	585196
hypothetical protein		88	57	11	71	60.6897	86.5854	9.96491	1.55884e-08	305026	543147	587357
Transcriptional regulator ManR	manR	86	59	11	71	59.3103	86.5854	9.40832	8.61702e-08	305506	543627	587837
Ascorbate-specific PTS system EIIB component	ulaB	94	51	20	62	64.8276	75.6098	5.71373	5.843e-05	307573	545694	589904				2.7.1.194
Ascorbate-specific PTS system EIIC component	ulaA_2	91	54	8	74	62.7586	90.2439	15.588	9.92177e-12	307872	545993	590203
Transketolase	tkt_2	94	51	22	60	64.8276	73.1707	5.02674	0.000652603	309163	547284	591494				2.2.1.1
putative HTH-type transcriptional regulator YbbH	ybbH_2	100	45	21	61	68.9655	74.3902	6.45503	3.77462e-06	311307	549428	593638		238242
N-acetylmuramic acid 6-phosphate etherase	murQ	99	46	21	61	68.2759	74.3902	6.25155	8.38958e-06	312284	550405	594615		239207		4.2.1.126
Anhydro-N-acetylmuramic acid kinase	anmK	92	53	20	62	63.4483	75.6098	5.38113	0.000280829	313195	551316	595526		240118		2.7.1.170
Lichenan permease IIC component	licC_3	99	46	21	61	68.2759	74.3902	6.25155	8.38958e-06	314352	552473	596683		241275
hypothetical protein		98	47	21	61	67.5862	74.3902	6.05674	1.96775e-05	315664	553785	597995		242587
hypothetical protein		99	46	21	61	68.2759	74.3902	6.25155	8.38958e-06	316543	554664	598874		243468
hypothetical protein		90	55	18	64	62.069	78.0488	5.81818	6.02928e-05	317882	556009	600219
hypothetical protein		133	12	50	32	91.7241	39.0244	7.09333	0.000631796	359939	600630	695233	291067
Signal peptidase I W	sipW_1	110	35	32	50	75.8621	60.9756	4.91071	0.00109008	399779	640470	735058				3.4.21.89
hypothetical protein		81	64	17	65	55.8621	79.2683	4.83915	0.00289244	401706	642397	736985
hypothetical protein		83	62	18	64	57.2414	78.0488	4.75986	0.00306974	403868	644559	739147
Imidazole glycerol phosphate synthase subunit HisH	hisH	131	14	48	34	90.3448	41.4634	6.62798	0.000670515	612671	865293	1112576				4.3.2.10
hypothetical protein		135	10	48	34	93.1034	41.4634	9.5625	1.06967e-05	724812	977075	1266867	691257	661215
IS110 family transposase ISSpn10		134	11	51	31	92.4138	37.8049	7.40463	0.000803115	929903	1195495	1491238	#N/A	#N/A		#N/A
hypothetical protein		129	16	47	35	88.9655	42.6829	6.00399	0.00153903	978279	1244384	1540122	972813		934693
hypothetical protein		103	42	29	53	71.0345	64.6341	4.48194	0.0045238	1029256	1441575	1629448
Glycogen biosynthesis protein GlgD	glgD	130	15	46	36	89.6552	43.9024	6.78261	0.000205164	1036068	1448387	1636260
hypothetical protein	ucpA	133	12	51	31	91.7241	37.8049	6.73693	0.0015964	1067546	1479865	1667738	1063314	1024767	1021139
hypothetical protein		127	18	44	38	87.5862	46.3415	6.09343	0.000356231	1072417	1484736	1672609	1066070	1027523
hypothetical protein		87	58	16	66	60	80.4878	6.1875	4.30619e-05	1091567	1495664	1691754
hypothetical protein		83	62	12	70	57.2414	85.3659	7.80914	1.98161e-06	1092115	1496212	1692302
ISLre2 family transposase ISTeha1		118	27	31	51	81.3793	62.1951	7.18996	7.50744e-07	1160185	1565831	1761922
hypothetical protein		112	33	29	53	77.2414	64.6341	6.20272	1.32199e-05	1161621	1567267	1763358
DNA ligase	ligA_2	112	33	30	52	77.2414	63.4146	5.88283	3.1895e-05	1161796	1567442	1763533				6.5.1.2
hypothetical protein		118	27	32	50	81.3793	60.9756	6.8287	2.19078e-06	1162108	1567754	1763845
hypothetical protein		114	31	28	54	78.6207	65.8537	7.09217	6.49496e-07	1162439	1568085	1764176
hypothetical protein		113	32	30	52	77.931	63.4146	6.12083	1.26701e-05	1163151	1568797	1764888
hypothetical protein		118	27	33	49	81.3793	59.7561	6.48934	9.73684e-06	1164110	1569610	1765701		1050058
hypothetical protein		118	27	33	49	81.3793	59.7561	6.48934	9.73684e-06	1164762	1570265	1766356	1128239
hypothetical protein		118	27	32	50	81.3793	60.9756	6.8287	2.19078e-06	1165004	1570507	1766598	1128364
hypothetical protein		118	27	32	50	81.3793	60.9756	6.8287	2.19078e-06	1165167	1570670	1766761
hypothetical protein		118	27	32	50	81.3793	60.9756	6.8287	2.19078e-06	1165253	1570756	1766847
hypothetical protein		118	27	32	50	81.3793	60.9756	6.8287	2.19078e-06	1166061	1571564	1767655	1129199
hypothetical protein		118	27	32	50	81.3793	60.9756	6.8287	2.19078e-06	1166488	1571992	1768083
hypothetical protein		65	80	8	74	44.8276	90.2439	7.51562	0.000303693	1310872	16615	16616
hypothetical protein		116	29	37	45	80	54.878	4.86486	0.00208966	1319858	31305	24786
N-acetyl-D-glucosamine kinase	nagK	106	39	31	51	73.1034	62.1951	4.47146	0.00376754	1347583	2467462	2789967			1347890	2.7.1.59
Glycerol kinase	glpK	139	6	57	25	95.8621	30.4878	10.1608	0.000890916	1369116	2434738	2761891	1360589	1289262	1372811	2.7.1.30
hypothetical protein		128	17	37	45	88.2759	54.878	9.15739	1.1553e-07	1387163	2416205	2741433
hypothetical protein		113	32	26	56	77.931	68.2927	7.60577	1.23068e-07	1414136	2382741	2707969
Tyrosine recombinase XerC	xerC_3	126	19	43	39	86.8966	47.561	6.01469	0.000390987	1419754	2355221	2703299			1448313
PTS system sorbose-specific EIIC component	sorA_2	93	52	20	62	64.1379	75.6098	5.54423	0.00012539	1433358	2334041	2682119		1369213
PTS system mannose-specific EIID component	manZ_3	93	52	20	62	64.1379	75.6098	5.54423	0.00012539	1434167	2333263	2681341		1369974
hypothetical protein	cmtB	121	24	36	46	83.4483	56.0976	6.44213	1.47718e-05	1435098	2330795	2678873		1372532	1436534
Dihydroorotate dehydrogenase	pyrD	123	22	37	45	84.8276	54.878	6.79975	8.10569e-06	1437136	2330161	2678239		1373228		1.3.-.-
putative licABCH operon regulator	licR	123	22	39	43	84.8276	52.439	6.16434	8.30317e-05	1437763	2329699	2677777		1373745
PTS system galactitol-specific EIIB component	gatB_2	123	22	39	43	84.8276	52.439	6.16434	8.30317e-05	1438240	2329402	2677480		1374211		2.7.1.200
PTS system galactitol-specific EIIC component	gatC_2	123	22	31	51	84.8276	62.1951	9.19795	8.22526e-09	1438537	2328022	2676100		1374717	1441016
D-galactonate dehydratase	dgoD	119	26	38	44	82.069	53.6585	5.2996	0.000575311	1439918	2326858	2674936	1440632			4.2.1.6
hypothetical protein		123	22	40	42	84.8276	51.2195	5.87045	0.000203688	1441088	2326381	2674459	1440986	1376465
Negative regulator of SacY activity	sacX	133	12	52	30	91.7241	36.5854	6.39423	0.00400612	1470495	2295507	2643585	1493330
hypothetical protein		122	23	34	48	84.1379	58.5366	7.48849	7.06966e-07	1474995	2292180	2640258
hypothetical protein		122	23	34	48	84.1379	58.5366	7.48849	7.06966e-07	1475244	2291862	2639940	1494683
hypothetical protein		127	18	38	44	87.5862	53.6585	8.16959	6.52007e-07	1475719	2290832	2638910	1495194
putative ABC transporter ATP-binding/permease protein		123	22	35	47	84.8276	57.3171	7.50779	1.01705e-06	1476681	2289171	2637249	1495583
hypothetical protein		133	12	46	36	91.7241	43.9024	8.67391	9.1991e-06	1484891	2281703	2629782	1484659	1419855	1521766
hypothetical protein		109	36	27	55	75.1724	67.0732	6.1677	9.01356e-06	1496463		2618681
hypothetical protein		116	29	34	48	80	58.5366	5.64706	9.48392e-05	1534152	2223840	2576871			1571861
hypothetical protein		112	33	23	59	77.2414	71.9512	8.70619	6.51941e-09	1550174		2560253
hypothetical protein		108	37	32	50	74.4828	60.9756	4.56081	0.00303404	1565683	2190352	2545231
hypothetical protein		116	29	31	51	80	62.1951	6.58065	3.52052e-06	1566907	2188225	2543101
hypothetical protein		133	12	50	32	91.7241	39.0244	7.09333	0.000631796	1575806	2179363	2534653	1613190
hypothetical protein		67	78	9	73	46.2069	89.0244	6.96724	0.000444847	1578311	2177113
hypothetical protein		49	96	4	78	33.7931	95.122	9.95312	0.00254173	1581308
Pseudouridine kinase	psuK	140	5	59	23	96.5517	28.0488	10.9153	0.00191258	1650323	2105313	2456995	1697865	1635924	1705497	2.7.1.83
GTP pyrophosphokinase	relA	122	23	42	40	84.1379	48.7805	5.05176	0.0029185	1704457	2048344	2398674		1690044		2.7.6.5
hypothetical protein	licC_1	125	20	37	45	86.2069	54.878	7.60135	1.4315e-06	1717163	2036725	2385526	1775473	1702622
N-(5'-phosphoribosyl)anthranilate isomerase	trpF	110	35	33	49	75.8621	59.7561	4.66667	0.0023811	1730999	2023605	2372416				5.3.1.24
Phosphinothricin N-acetyltransferase	pat	145	0	68	14	100	17.0732	inf	0.00425786	1923519	1857869	2125186	2018037	1947315		2.3.1.183
hypothetical protein		70	75	9	73	48.2759	89.0244	7.57037	5.52215e-05	1972745	1808770
hypothetical protein		127	18	45	37	87.5862	45.122	5.80123	0.00140659	2161517	273600	336254			2216442
hypothetical protein		123	22	43	39	84.8276	47.561	5.07082	0.00452773	2170351		1860185	2303598		2226235
hypothetical protein		110	35	32	50	75.8621	60.9756	4.91071	0.00109008	2243970	1589597	1785688
hypothetical protein		80	65	16	66	55.1724	80.4878	5.07692	0.00220147	2247907	1587224	1783315
hypothetical protein		68	77	9	73	46.8966	89.0244	7.16306	0.000214543	2248212	1586640	1782731
HTH-type transcriptional repressor YtrA	ytrA_2	112	33	29	53	77.2414	64.6341	6.20272	1.32199e-05	2249169	1585771	1781862	2429571		2365820
Vitamin B12 import ATP-binding protein BtuD	btuD_2	113	32	26	56	77.931	68.2927	7.60577	1.23068e-07	2249545	1584936	1781027				7.6.2.8
hypothetical protein		114	31	29	53	78.6207	64.6341	6.7208	1.86473e-06	2250406	1584261	1780352		2429171
hypothetical protein		118	27	32	50	81.3793	60.9756	6.8287	2.19078e-06	2251571	1583387	1779478
hypothetical protein		118	27	32	50	81.3793	60.9756	6.8287	2.19078e-06	2252087	1583009	1779100
hypothetical protein		118	27	32	50	81.3793	60.9756	6.8287	2.19078e-06	2252336	1582626	1778717
Biotin transporter BioY	bioY	112	33	24	58	77.2414	70.7317	8.20202	2.16221e-08	2253501	1579905	1775996	2433501
ATP-dependent dethiobiotin synthetase BioD 1	bioD1	112	33	23	59	77.2414	71.9512	8.70619	6.51941e-09	2254057	1579247	1775338				6.3.3.3
Biotin synthase	bioB	113	32	27	55	77.931	67.0732	7.19329	3.80358e-07	2254722	1578297	1774388	2435091		2368689	2.8.1.6
hypothetical protein		114	31	28	54	78.6207	65.8537	7.09217	6.49496e-07	2256220	1577420	1773511
hypothetical protein		102	43	24	58	70.3448	70.7317	5.73256	4.04914e-05	2257426	1574445	1770536
hypothetical protein		67	78	8	74	46.2069	90.2439	7.94551	7.39079e-05		142694
PTS system cellobiose-specific EIIB component	celA_1	121	24	38	44	83.4483	53.6585	5.83772	0.000146036		298647	364723			18771	2.7.1.205
PTS system galactose-specific EIIA component	ptcA_2	125	20	40	42	86.2069	51.2195	6.5625	4.35789e-05		298999	365075			19123
IS200/IS605 family transposase ISEfa4		89	56	18	64	61.3793	78.0488	5.65079	0.000123742		702095	938853
hypothetical protein		106	39	29	53	73.1034	64.6341	4.96729	0.000774813		1583793	1779884
IS66 family transposase ISSwo2		80	65	12	70	55.1724	85.3659	7.17949	1.17549e-05		1587988	1784079
Lon protease	lon	66	79	6	76	45.5172	92.6829	10.5823	5.66075e-06		1900685					3.4.21.53
hypothetical protein		77	68	14	68	53.1034	82.9268	5.5	0.00085876		1903290	1004899
hypothetical protein		86	59	14	68	59.3103	82.9268	7.0799	6.02281e-06		1908789	998795
hypothetical protein		45	100	2	80	31.0345	97.561	18	0.000486713		1910306
PTS system sorbose-specific EIIB component	sorB_1	71	74	10	72	48.9655	87.8049	6.90811	0.00014766		2334844	2682922				2.7.1.206
hypothetical protein		70	75	10	72	48.2759	87.8049	6.72	0.000298084		2335375	2683453
Rhamnulokinase	rhaB	70	75	10	72	48.2759	87.8049	6.72	0.000298084		2336861	2684939				2.7.1.5
L-fucose isomerase	fucI	70	75	10	72	48.2759	87.8049	6.72	0.000298084		2338300	2686378				5.3.1.25
5-deoxy-D-ribulose 1-phosphate aldolase	drdA	70	75	10	72	48.2759	87.8049	6.72	0.000298084		2340088	2688166				4.1.2.-
Transcriptional activator protein Anr	anr	118	27	34	48	81.3793	58.5366	6.16993	2.41287e-05		2347302	2695380	1444561	1379757
hypothetical protein		76	69	10	72	52.4138	87.8049	7.93043	7.23887e-06		2351170	2699248
Vitamin B12 import ATP-binding protein BtuD	btuD_4	128	17	41	41	88.2759	50	7.52941	6.83251e-06		2448320	2769811				7.6.2.8
hypothetical protein		129	16	43	39	88.9655	47.561	7.3125	2.36031e-05		2449332	2770823
hypothetical protein	ngcG_1	129	16	43	39	88.9655	47.561	7.3125	2.36031e-05		2450192	2771683
hypothetical protein		129	16	42	40	88.9655	48.7805	7.67857	8.85042e-06		2450998	2772489
hypothetical protein		129	16	43	39	88.9655	47.561	7.3125	2.36031e-05		2451812	2773303
Histidinol-phosphatase	hisK_2	129	16	43	39	88.9655	47.561	7.3125	2.36031e-05		2453081	2774572				3.1.3.15
hypothetical protein		128	17	43	39	88.2759	47.561	6.829	7.89059e-05		2454457	2775948
Choline trimethylamine-lyase activating enzyme	cutD_2	129	16	43	39	88.9655	47.561	7.3125	2.36031e-05		2454960	2776451				1.97.1.-
hypothetical protein		127	18	40	42	87.5862	51.2195	7.40833	8.2421e-06		2455791	2777282
hypothetical protein		101	44	27	55	69.6552	67.0732	4.67593	0.00135886		2470703	2791351			1346662
hypothetical protein		39	106	1	81	26.8966	98.7805	29.8019	0.00128798			30012
hypothetical protein		41	104	1	81	28.2759	98.7805	31.9327	0.00032197			39222
hypothetical protein		41	104	2	80	28.2759	97.561	15.7692	0.00389735			42913
hypothetical protein		41	104	2	80	28.2759	97.561	15.7692	0.00389735			43923
hypothetical protein		38	107	1	81	26.2069	98.7805	28.7664	0.00147086			44976
hypothetical protein		40	105	1	81	27.5862	98.7805	30.8571	0.000632056			45739
hypothetical protein		38	107	1	81	26.2069	98.7805	28.7664	0.00147086			45991
hypothetical protein		38	107	1	81	26.2069	98.7805	28.7664	0.00147086			46212
hypothetical protein		38	107	1	81	26.2069	98.7805	28.7664	0.00147086			46607
hypothetical protein		40	105	0	82	27.5862	100	inf	3.01832e-05			59094
hypothetical protein		39	106	1	81	26.8966	98.7805	29.8019	0.00128798			59421
Bacitracin export permease protein BceB	bceB_2	70	75	12	70	48.2759	85.3659	5.44444	0.00441934			380588
hypothetical protein		54	91	6	76	37.2414	92.6829	7.51648	0.00419665			998124
putative inner membrane transporter YicL	yicL	58	87	7	75	40	91.4634	7.14286	0.00194243			1007119
hypothetical protein		31	114	0	82	21.3793	100	inf	0.00443218			1283161
hypothetical protein		31	114	0	82	21.3793	100	inf	0.00443218			1283723
hypothetical protein		31	114	0	82	21.3793	100	inf	0.00443218			1284041
hypothetical protein		31	114	0	82	21.3793	100	inf	0.00443218			1284928
hypothetical protein		31	114	0	82	21.3793	100	inf	0.00443218			1287016
hypothetical protein		31	114	0	82	21.3793	100	inf	0.00443218			1290819
hypothetical protein		31	114	0	82	21.3793	100	inf	0.00443218			1291982
putative RNA methyltransferase		68	77	10	72	46.8966	87.8049	6.35844	0.000689357			1299645				2.1.1.-
hypothetical protein		64	81	8	74	44.1379	90.2439	7.30864	0.000353721			1312753	726901	696859
hypothetical protein		104	41	28	54	71.7241	65.8537	4.89199	0.000917018			2632388	1482336	1417532	1519858
hypothetical protein		54	91	4	78	37.2414	95.122	11.5714	0.000153147			2751426
hypothetical protein		53	92	3	79	36.5517	96.3415	15.1703	3.49073e-05
ISL3 family transposase IS1476		72	73	8	74	49.6552	90.2439	9.12329	6.37449e-06
Regulatory protein Spx	spxA_2	45	100	55	27	31.0345	32.9268	0.220909	0.00274333				11387	11285	14299
hypothetical protein		48	97	59	23	33.1034	28.0488	0.192906	0.000285272				22446	24648	22796
Lipoate-protein ligase LplJ	lplJ_1	16	129	49	33	11.0345	40.2439	0.0835311	1.72142e-10				184407	180710	158327	6.3.1.20
hypothetical protein	paiA	6	139	25	57	4.13793	69.5122	0.0984173	0.000890916				270256	269105	260066
putative FMN/FAD exporter YeeO	yeeO	15	130	37	45	10.3448	54.878	0.140333	8.11395e-05				555101	520309	508283
HTH-type transcriptional regulator GmuR	gmuR_1	4	141	23	59	2.75862	71.9512	0.0727721	0.000475394				680938	644736	634051
Glycogen phosphorylase	glgP	12	133	32	50	8.27586	60.9756	0.140977	0.000631796				1031162	993321	988356	2.4.1.1
putative oxidoreductase YghA	yghA_1	29	116	44	38	20	46.3415	0.215909	0.00465436				1299591	1216764	1446359	1.-.-.-
hypothetical protein		29	116	44	38	20	46.3415	0.215909	0.00465436				1300049	1217222	1446237
hypothetical protein		15	130	36	46	10.3448	56.0976	0.147436	0.000205164	1380433			1372243	1300916	1384178
hypothetical protein		17	128	43	39	11.7241	47.561	0.120458	8.59302e-07				1379223	1308030	1391019
hypothetical protein		21	124	44	38	14.4828	46.3415	0.146261	1.12913e-05				1477820	1413016	1500882
hypothetical protein		10	135	31	51	6.89655	62.1951	0.121864	0.000209373				1501503	1428991	1530952
putative ABC transporter permease YknZ	yknZ	25	120	41	41	17.2414	50	0.208333	0.00468779				1561884	1489034	1583301
GTP pyrophosphokinase	relA	23	122	40	42	15.8621	51.2195	0.197951	0.0029185				1751991		1765354	2.7.6.5
Ribosomal RNA small subunit methyltransferase C	rsmC	11	134	29	53	7.58621	64.6341	0.150026	0.00456743				2256015			2.1.1.172
hypothetical protein		4	141	21	61	2.75862	74.3902	0.0824046	0.00383606				2365802	2064927	2055942
hypothetical protein		12	133	31	51	8.27586	62.1951	0.148436	0.0015964					290596	280370
hypothetical protein		19	126	39	43	13.1034	52.439	0.16626	0.000390987						155319
hypothetical protein		41	104	55	27	28.2759	32.9268	0.193531	0.000223284	1482568	2284308				1505401
hypothetical protein		54	91	65	17	37.2414	20.7317	0.155199	9.83334e-06			2070016			2007752
hypothetical protein		10	135	29	53	6.89655	64.6341	0.135377	0.00272677
hypothetical protein		0	145	14	68	0	82.9268	0	0.00425786
hypothetical protein		0	145	14	68	0	82.9268	0	0.00425786

## Sheet: Table S4
Table S4. Scoary output for gene presence-absence for phenotypic trait Sepsis Strict. Columns are as in Table S3. Start is the genome start position for the locus in each of 3 complete BCO isolate genomes, four sepsis isolate genomes with the position as contig.start position (formatted with leading zeroes), and 3 complete cecal isolate genomes. EC numbers are given where available for each locus…
										Start
Locus		positive		negative		Sensi-tivity	Speci-ficity	Odds ratio	Bonferroni P-value	BCO			Sepsis				Cecal
Annotation	Gene	present	absent	present	absent					SA1	CIRMBP-1274	CIRMBP-1228	1750	1751	1752	1753	CE1	CE2	CE3	EC Number
Vitamin B12 import ATP-binding protein BtuD	btuD_3	22	12	40	153	64.7059	79.2746	7.0125	0.00994942			2474100	10.0049922			1.0037820				7.6.2.8
hypothetical protein		22	12	44	149	64.7059	77.2021	6.20833	0.0397048			2472480	10.0048302			1.0039584
hypothetical protein		12	22	7	186	35.2941	96.3731	14.4935	0.00669959					2.0132922		2.0132923
hypothetical protein		11	23	3	190	32.3529	98.4456	30.2899	0.000673586					2.0138134		2.0138135
Biotin carboxyl carrier protein of acetyl-CoA carboxylase	accB	12	22	4	189	35.2941	97.9275	25.7727	0.00032778					1.0113446		3.0003537
hypothetical protein		16	18	12	181	47.0588	93.7824	13.4074	0.000246621					5.0018305		4.0018305
hypothetical protein		16	18	12	181	47.0588	93.7824	13.4074	0.000246621					5.0018781		4.0018781
putative phosphotransferase enzyme IIB component		16	18	13	180	47.0588	93.2642	12.3077	0.000503686					5.0019214		4.0019214
N-acetylgalactosamine permease IIC component 1	agaC_1	17	17	13	180	50	93.2642	13.8462	8.01132e-05					5.0019712	1.0270002	4.0019712
PTS system mannose-specific EIID component	manZ_1	17	17	13	180	50	93.2642	13.8462	8.01132e-05					5.0020475	1.0269194	4.0020475
Fructosamine deglycase FrlB	frlB	16	18	12	181	47.0588	93.7824	13.4074	0.000246621					5.0021317		4.0021317
hypothetical protein	maeA	20	14	24	169	58.8235	87.5648	10.0595	0.000281462					5.0127194		4.0126396
NAD-dependent malic enzyme		18	16	21	172	52.9412	89.1192	9.21429	0.00186479					5.0127437		4.0126639
hypothetical protein		10	24	2	191	29.4118	98.9637	39.7917	0.00121672					1.0080566		7.0080550
hypothetical protein		13	21	9	184	38.2353	95.3368	12.6561	0.00570231					10.0062483		8.0041327
hypothetical protein		12	22	6	187	35.2941	96.8912	17	0.00273207					10.0059611		8.0044238
hypothetical protein		12	22	6	187	35.2941	96.8912	17	0.00273207					10.0059347		8.0044610
hypothetical protein		12	22	6	187	35.2941	96.8912	17	0.00273207					10.0058953		8.0044941
hypothetical protein		12	22	4	189	35.2941	97.9275	25.7727	0.00032778					10.0058809		8.0045301
hypothetical protein		13	21	10	183	38.2353	94.8187	11.3286	0.0118782					10.0055181		8.0048110
hypothetical protein		12	22	8	185	35.2941	95.8549	12.6136	0.0151258					10.0050567		8.0053432
hypothetical protein		12	22	8	185	35.2941	95.8549	12.6136	0.0151258					10.0050025		8.0053701
hypothetical protein		12	22	8	185	35.2941	95.8549	12.6136	0.0151258					10.0048193		8.0055608
hypothetical protein		12	22	8	185	35.2941	95.8549	12.6136	0.0151258					10.0046911		8.0056032
hypothetical protein		12	22	8	185	35.2941	95.8549	12.6136	0.0151258					10.0045448		8.0057363
hypothetical protein		12	22	8	185	35.2941	95.8549	12.6136	0.0151258					10.0044157		8.0058735
hypothetical protein		12	22	8	185	35.2941	95.8549	12.6136	0.0151258					10.0044058		8.0060091
hypothetical protein		12	22	8	185	35.2941	95.8549	12.6136	0.0151258					10.0043654		8.0060387
hypothetical protein		12	22	8	185	35.2941	95.8549	12.6136	0.0151258					10.0042891		8.0060766
hypothetical protein		12	22	8	185	35.2941	95.8549	12.6136	0.0151258					10.0041973		8.0061357
hypothetical protein		12	22	8	185	35.2941	95.8549	12.6136	0.0151258					10.0041757		8.0062284
hypothetical protein		12	22	8	185	35.2941	95.8549	12.6136	0.0151258					10.0041413		8.0062487
hypothetical protein		12	22	8	185	35.2941	95.8549	12.6136	0.0151258					10.0041118		8.0062788
hypothetical protein		12	22	8	185	35.2941	95.8549	12.6136	0.0151258					10.0040718		8.0063116
hypothetical protein		12	22	8	185	35.2941	95.8549	12.6136	0.0151258					10.0040347		8.0063523
hypothetical protein		12	22	8	185	35.2941	95.8549	12.6136	0.0151258					10.0039801		8.0063895
hypothetical protein		12	22	8	185	35.2941	95.8549	12.6136	0.0151258					10.0039479		8.0064478
hypothetical protein		12	22	8	185	35.2941	95.8549	12.6136	0.0151258					10.0039162		8.0064852
hypothetical protein		12	22	8	185	35.2941	95.8549	12.6136	0.0151258					10.0035285		8.0065081
hypothetical protein		12	22	8	185	35.2941	95.8549	12.6136	0.0151258					10.0033775		8.0068961
hypothetical protein		13	21	10	183	38.2353	94.8187	11.3286	0.0118782				37.0000316	10.0028804		8.0070467
hypothetical protein		12	22	8	185	35.2941	95.8549	12.6136	0.0151258					10.0028586		8.0075434
hypothetical protein		19	15	31	162	55.8824	83.9378	6.61935	0.0342994			1345991		8.0098207		12.0012580
hypothetical protein		13	21	6	187	38.2353	96.8912	19.2937	0.000417689					8.0092383		12.0018533
hypothetical protein		13	21	6	187	38.2353	96.8912	19.2937	0.000417689					8.0091583		12.0019123
Type-2 restriction enzyme DpnII	dpnB	14	20	12	181	41.1765	93.7824	10.5583	0.0084414					8.0090684		12.0019881				3.1.21.4
Modification methylase DpnIIB	dpnA	14	20	13	180	41.1765	93.2642	9.69231	0.0159203					8.0089893		12.0020729				2.1.1.72
Modification methylase DpnIIA	dpnM	14	20	13	180	41.1765	93.2642	9.69231	0.0159203					8.0089049		12.0021531				2.1.1.72
hypothetical protein		13	21	6	187	38.2353	96.8912	19.2937	0.000417689					8.0084998		12.0024913
hypothetical protein		12	22	6	187	35.2941	96.8912	17	0.00273207					8.0077194		12.0033554
hypothetical protein		12	22	4	189	35.2941	97.9275	25.7727	0.00032778					8.0076836		12.0034227
hypothetical protein		12	22	3	190	35.2941	98.4456	34.5455	9.05972e-05					8.0076604		12.0034588
2-succinyl-6-hydroxy-2,4-cyclohexadiene-1-carboxylate synthase	menH_2	14	20	13	180	41.1765	93.2642	9.69231	0.0159203					8.0073388		12.0037384
hypothetical protein		12	22	6	187	35.2941	96.8912	17	0.00273207					8.0059213		12.0052024
hypothetical protein		10	24	3	190	29.4118	98.4456	26.3889	0.00473889					8.0058598		12.0052393
2-methoxy-6-polyprenyl-1,4-benzoquinol methylase, mitochondrial	COQ5_2	12	22	5	188	35.2941	97.4093	20.5091	0.00100763					8.0057628		12.0053045				2.1.1.163
hypothetical protein		11	23	3	190	32.3529	98.4456	30.2899	0.000673586					8.0049650	5.0170502	12.0061167
hypothetical protein		15	19	17	176	44.1176	91.1917	8.17337	0.0305587					8.0048692	5.0169544	12.0061918
ABC-F type ribosomal protection protein Lsa(E)	lsa(E)	15	19	17	176	44.1176	91.1917	8.17337	0.0305587					8.0047154	5.0168006	12.0062775
hypothetical protein		15	19	7	186	44.1176	96.3731	20.9774	2.31686e-05					8.0046226	5.0167078	12.0064702
Streptomycin 3''-adenylyltransferase	ant1	14	20	8	185	41.1765	95.8549	16.1875	0.000409408					8.0044278	5.0165130	12.0066326
ISNCY family transposase ISSeq2		20	14	32	161	58.8235	83.4197	7.1875	0.0109532			1303590		8.0038234		12.0072862
hypothetical protein		12	22	3	190	35.2941	98.4456	34.5455	9.05972e-05					8.0038007		12.0073212
hypothetical protein		12	22	3	190	35.2941	98.4456	34.5455	9.05972e-05					8.0037390		12.0073433
hypothetical protein		12	22	3	190	35.2941	98.4456	34.5455	9.05972e-05					8.0035905		12.0074027
hypothetical protein		12	22	3	190	35.2941	98.4456	34.5455	9.05972e-05					8.0035179		12.0075527
hypothetical protein		12	22	3	190	35.2941	98.4456	34.5455	9.05972e-05					8.0032921		12.0076258
hypothetical protein		12	22	3	190	35.2941	98.4456	34.5455	9.05972e-05					8.0031861		12.0078485
hypothetical protein		12	22	3	190	35.2941	98.4456	34.5455	9.05972e-05					8.0031575		12.0079722
hypothetical protein		12	22	3	190	35.2941	98.4456	34.5455	9.05972e-05					8.0028922		12.0081745
hypothetical protein		12	22	3	190	35.2941	98.4456	34.5455	9.05972e-05					8.0028209		12.0082503
hypothetical protein		12	22	3	190	35.2941	98.4456	34.5455	9.05972e-05					8.0025096		12.0085268
hypothetical protein		10	24	3	190	29.4118	98.4456	26.3889	0.00473889					12.0023167		13.0041251
hypothetical protein		12	22	8	185	35.2941	95.8549	12.6136	0.0151258				16.0000013	13.0000007		14.0000007
hypothetical protein		11	23	7	186	32.3529	96.3731	12.7081	0.0387848					15.0031764		15.0016558
hypothetical protein		11	23	3	190	32.3529	98.4456	30.2899	0.000673586					15.0021808		15.0026499
putative licABCH operon regulator	licR_4	10	24	5	188	29.4118	97.4093	15.6667	0.0401529					20.0039187		18.0000024
Lichenan permease IIC component	licC_4	12	22	9	184	35.2941	95.3368	11.1515	0.0318606					20.0033664		18.0007032
hypothetical protein		12	22	4	189	35.2941	97.9275	25.7727	0.00032778					20.0025461		18.0013864
hypothetical protein		15	19	13	180	44.1176	93.2642	10.9312	0.00293904					20.0024636	1.0128492	18.0016342
hypothetical protein		12	22	8	185	35.2941	95.8549	12.6136	0.0151258					20.0024392		18.0016529
hypothetical protein		12	22	8	185	35.2941	95.8549	12.6136	0.0151258					20.0024218		18.0016790
hypothetical protein		12	22	6	187	35.2941	96.8912	17	0.00273207					20.0022424		18.0017348
hypothetical protein		12	22	7	186	35.2941	96.3731	14.4935	0.00669959					20.0021017		18.0019037
hypothetical protein		12	22	8	185	35.2941	95.8549	12.6136	0.0151258					20.0020516		18.0020147
hypothetical protein		12	22	8	185	35.2941	95.8549	12.6136	0.0151258					20.0020113		18.0020850
hypothetical protein		13	21	9	184	38.2353	95.3368	12.6561	0.00570231					20.0018999	1.0110189	18.0021934
hypothetical protein		13	21	9	184	38.2353	95.3368	12.6561	0.00570231					20.0018149	1.0109343	18.0022295
Aryl-phospho-beta-D-glucosidase BglH	bglH_3	11	23	7	186	32.3529	96.3731	12.7081	0.0387848						8.0000025	24.0022099
hypothetical protein		13	21	5	188	38.2353	97.4093	23.2762	0.000145408					8.0021938	5.0148750	25.0000066
hypothetical protein		12	22	3	190	35.2941	98.4456	34.5455	9.05972e-05					8.0021143		25.0001440
hypothetical protein		13	21	5	188	38.2353	97.4093	23.2762	0.000145408					8.0018730		25.0003844
hypothetical protein		12	22	8	185	35.2941	95.8549	12.6136	0.0151258					8.0000165		25.0018239
hypothetical protein		24	10	49	144	70.5882	74.6114	7.05306	0.0163012			1004033	18.0046554	25.0000287	3.0204756	26.0000008
IS110 family transposase ISSpn10		10	24	5	188	29.4118	97.4093	15.6667	0.0401529					35.0000404		37.0000144
ISL3 family transposase IS1476		12	22	9	184	35.2941	95.3368	11.1515	0.0318606					36.0000133		38.0000133
hypothetical protein		9	25	1	192	26.4706	99.4819	69.12	0.0017826							48.0000199
Nitrogen regulatory protein P-II	glnB	22	12	184	9	64.7059	4.66321	0.0896739	0.0318606	1891122	1889850	2158786	22.0012340		3.0190710
NAD(P)H-dependent FAD/FMN reductase		24	10	189	4	70.5882	2.07254	0.0507937	0.0149022	1069723	1482042	1669915	5.0096860		2.0195031					1.5.1.45
hypothetical protein		22	12	190	3	64.7059	1.5544	0.0289474	9.05972e-05	1828696	1927766	2222109	18.0024245		3.0226837
hypothetical protein		22	12	190	3	64.7059	1.5544	0.0289474	9.05972e-05	1893515	1887802	2156125	22.0009683		3.0187895

## Sheet: Table S5
Table S5. Scoary output for gene presence-absence for phenotypic trait Sepsis Strict Reducced. Columns are as in Table S3. Start is the genome start position for the locus in each of four sepsis isolate genomes with the position as contig.start position (formatted with leading zeroes). EC numbers are given where available for each locus. Loci are sorted on Start in 1752 genome, then on Start in 1…
										Start
Locus		Positive		Negative		Sensi-tivity	Speci-ficity	Odds ratio	Bonferroni P-value	Sepsis				EC Number
Annotation	Gene	present	absent	present	absent					1750	1751	1752	1753
D-alanine--D-alanyl carrier protein ligase	dltA	22	0	93	20	100	17.6991	inf	1	16.0014475	13.0014469	1.0040494	14.0014469	6.2.1.54
hypothetical protein		3	19	0	113	13.6364	100	inf	1			1.0116537
Aspartate aminotransferase		3	19	0	113	13.6364	100	inf	1			1.0117245		2.6.1.1
PTS system beta-glucoside-specific EIIBCA component	bglF_1	3	19	0	113	13.6364	100	inf	1			1.0118478
2-iminobutanoate/2-iminopropanoate deaminase	yabJ_1	3	19	0	113	13.6364	100	inf	1			1.0119882		3.5.99.10
Aryl-phospho-beta-D-glucosidase BglA	bglA_1	3	19	0	113	13.6364	100	inf	1			1.0120442		3.2.1.86
hypothetical protein		3	19	0	113	13.6364	100	inf	1			1.0122294
hypothetical protein		3	19	1	112	13.6364	99.115	17.6842	1			1.0122871
hypothetical protein		5	17	6	107	22.7273	94.6903	5.2451	1		20.0024636	1.0128492	18.0016342
hypothetical protein		2	20	0	113	9.09091	100	inf	1			1.0138358
hypothetical protein		2	20	0	113	9.09091	100	inf	1			1.0138620
Insertion sequence IS5376 putative ATP-binding protein		2	20	0	113	9.09091	100	inf	1			1.0139909
hypothetical protein		2	20	0	113	9.09091	100	inf	1			1.0140672
hypothetical protein		2	20	0	113	9.09091	100	inf	1			1.0141080
hypothetical protein		2	20	0	113	9.09091	100	inf	1			1.0141655
dTDP-6-deoxy-L-talose 4-dehydrogenase (NAD(+))	tll	2	20	0	113	9.09091	100	inf	1			1.0142260		1.1.1.339
dTDP-glucose 4,6-dehydratase 2	rffG	2	20	0	113	9.09091	100	inf	1			1.0143427		4.2.1.46
Glucose-1-phosphate thymidylyltransferase	rmlA	2	20	0	113	9.09091	100	inf	1			1.0144742		2.7.7.24
Putative O-antigen transporter	rfbX	2	20	0	113	9.09091	100	inf	1			1.0145398
hypothetical protein		2	20	0	113	9.09091	100	inf	1			1.0146860
GalNAc-alpha-(1->4)-GalNAc-alpha-(1->3)-diNAcBac-PP-undecaprenol alpha-1,4-N-acetyl-D-galactosaminyltransferase	pglH	2	20	0	113	9.09091	100	inf	1			1.0148263		2.4.1.292
hypothetical protein		2	20	0	113	9.09091	100	inf	1			1.0149332
2,3,4,5-tetrahydropyridine-2,6-dicarboxylate N-acetyltransferase	dapH_1	2	20	0	113	9.09091	100	inf	1			1.0150577		2.3.1.89
hypothetical protein		2	20	0	113	9.09091	100	inf	1			1.0151176
Phosphoribosylamine--glycine ligase	purD_1	2	20	0	113	9.09091	100	inf	1			1.0152192		6.3.4.13
hypothetical protein		2	20	0	113	9.09091	100	inf	1			1.0153381
Undecaprenyl phosphate N,N'-diacetylbacillosamine 1-phosphate transferase	pglC	2	20	0	113	9.09091	100	inf	1			1.0154460		2.7.8.36
UDP-4-amino-4-deoxy-L-arabinose--oxoglutarate aminotransferase	arnB	2	20	0	113	9.09091	100	inf	1			1.0155113		2.6.1.87
O-acetyl-L-homoserine sulfhydrylase		21	1	83	30	95.4545	26.5487	7.59036	1	7.0095836	5.0045429	1.0244073	4.0045429	2.5.1.-
PTS system mannose-specific EIID component	manZ_1	6	16	11	102	27.2727	90.2655	3.47727	1		5.0020475	1.0269194	4.0020475
N-acetylgalactosamine permease IIC component 1	agaC_1	6	16	11	102	27.2727	90.2655	3.47727	1		5.0019712	1.0270002	4.0019712
Transcriptional regulatory protein DagR	dgaR_2	17	5	54	59	77.2727	52.2124	3.71481	1	27.0000503	5.0015449	1.0272294	4.0015449
3-hexulose-6-phosphate isomerase	rmpB	16	6	48	65	72.7273	57.5221	3.61111	1	27.0006009	5.0012307	1.0277641	4.0012307	5.3.1.27
hypothetical protein		22	0	76	37	100	32.7434	inf	1	27.0008819	5.0008996	1.0280317	4.0008996
IS982 family transposase ISSsu12		5	17	8	105	22.7273	92.9204	3.86029	1			2.0060496
hypothetical protein		5	17	8	105	22.7273	92.9204	3.86029	1		1.0152805	2.0269839	3.0042896
hypothetical protein	oppF_1	2	20	0	113	9.09091	100	inf	1			4.0005558
putative ABC transporter ATP-binding protein		10	12	25	88	45.4545	77.8761	2.93333	1			4.0090285
hypothetical protein		11	11	27	86	50	76.1062	3.18519	1			4.0095438
2,5-diketo-D-gluconic acid reductase A	dkgA	20	2	78	35	90.9091	30.9735	4.48718	1	10.0000517		4.0123724	1.0090389	1.1.1.274
hypothetical protein		4	18	2	111	18.1818	98.2301	12.3333	1		8.0046226	5.0167078	12.0064702
ABC-F type ribosomal protection protein Lsa(E)	lsa(E)	4	18	5	108	18.1818	95.5752	4.8	1		8.0047154	5.0168006	12.0062775
hypothetical protein		4	18	5	108	18.1818	95.5752	4.8	1		8.0048692	5.0169544	12.0061918
hypothetical protein		3	19	2	111	13.6364	98.2301	8.76316	1		8.0049650	5.0170502	12.0061167
hypothetical protein	licA	5	17	5	108	22.7273	95.5752	6.35294	1			6.0050510	29.0008396
PTS system galactose-specific EIIA component	ptcA_1	18	4	108	5	81.8182	4.42478	0.208333	1	8.0009271	3.0058213	6.0053128
hypothetical protein		19	3	111	2	86.3636	1.76991	0.114114	1	8.0003865	3.0061493	6.0056403
hypothetical protein		11	11	30	83	50	73.4513	2.76667	1		15.0028865	7.0018651	15.0018893
hypothetical protein		4	18	3	110	18.1818	97.3451	8.14815	1		12.0051054	7.0064817	13.0013382
putative ABC transporter ATP-binding/permease protein	thiQ	4	18	0	113	18.1818	100	inf	1			7.0121845
hypothetical protein		2	20	0	113	9.09091	100	inf	1			7.0124545
D-erythronate 4-phosphate dehydrogenase	pdxA2	2	20	0	113	9.09091	100	inf	1			7.0125788		1.1.1.409
Long-chain-alcohol dehydrogenase 1	adh1	2	20	0	113	9.09091	100	inf	1			7.0126824		1.1.1.192
hypothetical protein		2	20	0	113	9.09091	100	inf	1			7.0129426
hypothetical protein		2	20	0	113	9.09091	100	inf	1			7.0131306
hypothetical protein		2	20	0	113	9.09091	100	inf	1			7.0131676
4-hydroxy-tetrahydrodipicolinate synthase	dapA_2	2	20	0	113	9.09091	100	inf	1			7.0133033		4.3.3.7
HTH-type transcriptional activator mta	mta	2	20	0	113	9.09091	100	inf	1			8.0118442
hypothetical protein		18	4	110	3	81.8182	2.65487	0.122727	1	1.0217250		9.0047406
hypothetical protein		3	19	1	112	13.6364	99.115	17.6842	1			9.0095290
hypothetical protein		2	20	0	113	9.09091	100	inf	1			10.0056597
Carbohydrate deacetylase		8	14	18	95	36.3636	84.0708	3.01587	1			10.0068687		3.5.1.-
Aryl-phospho-beta-D-glucosidase BglH	bglH_5	8	14	19	94	36.3636	83.1858	2.82707	1			10.0069457		3.2.1.86
Lichenan permease IIC component	licC_5	8	14	19	94	36.3636	83.1858	2.82707	1			10.0070940
Transcriptional activator protein Anr	anr	7	15	11	102	31.8182	90.2655	4.32727	1	20.0000660	23.0001149	11.0054880	21.0028819
hypothetical protein		19	3	64	49	86.3636	43.3628	4.84896	1		10.0070632	12.0033586	8.0032368
hypothetical protein		19	3	62	51	86.3636	45.1327	5.20968	1		10.0071866	12.0034820	8.0028317
hypothetical protein		19	3	64	49	86.3636	43.3628	4.84896	1		10.0075914	12.0038868	8.0027206
hypothetical protein		19	3	64	49	86.3636	43.3628	4.84896	1		10.0077016	12.0039970	8.0025753
ABC transporter ATP-binding protein NatA	natA	20	2	113	0	90.9091	0	0	1	12.0049764	1.0207400	13.0026036	3.0097491	7.2.2.4
Tyrosine recombinase XerC	xerC_3	5	17	8	105	22.7273	92.9204	3.86029	1	30.0004502		15.0004965
hypothetical protein		7	15	14	99	31.8182	87.6106	3.3	1		7.0035556	16.0016089	6.0089622
hypothetical protein		6	16	11	102	27.2727	90.2655	3.47727	1		7.0036034	16.0016567	6.0089345
hypothetical protein		6	16	11	102	27.2727	90.2655	3.47727	1		7.0036329	16.0016853	6.0089029
hypothetical protein		3	19	2	111	13.6364	98.2301	8.76316	1			28.0000303
Ascorbate-specific PTS system EIIC component	ulaA	12	10	34	79	54.5455	69.9115	2.78824	1	10.0062647	9.0078299		1.0024575
Vitamin B12 import ATP-binding protein BtuD	btuD_3	11	11	29	84	50	74.3363	2.89655	1	10.0049922			1.0037820	7.6.2.8
hypothetical protein		11	11	30	83	50	73.4513	2.76667	1	10.0048302			1.0039584
putative ABC transporter ATP-binding protein		12	10	88	25	54.5455	22.1239	0.340909	1	9.0040164	4.0114375		1.0120850
hypothetical protein	maeA	9	13	15	98	40.9091	86.7257	4.52308	1		5.0127194		4.0126396
hypothetical protein		2	20	0	113	9.09091	100	inf	1		1.0080566		7.0080550
IS200/IS605 family transposase ISEfa4		13	9	33	80	59.0909	70.7965	3.50168	1		10.0079949		8.0023150
hypothetical protein		3	19	2	111	13.6364	98.2301	8.76316	1		8.0092383		12.0018533
hypothetical protein		3	19	2	111	13.6364	98.2301	8.76316	1		8.0091583		12.0019123
Type-2 restriction enzyme DpnII	dpnB	4	18	2	111	18.1818	98.2301	12.3333	1		8.0090684		12.0019881	3.1.21.4
Modification methylase DpnIIB	dpnA	4	18	2	111	18.1818	98.2301	12.3333	1		8.0089893		12.0020729	2.1.1.72
Modification methylase DpnIIA	dpnM	4	18	2	111	18.1818	98.2301	12.3333	1		8.0089049		12.0021531	2.1.1.72
hypothetical protein		3	19	2	111	13.6364	98.2301	8.76316	1		8.0084998		12.0024913
hypothetical protein		19	3	111	2	86.3636	1.76991	0.114114	1	4.0025303	18.0025303		17.0025303
hypothetical protein		12	10	31	82	54.5455	72.5664	3.17419	1				24.0014212
hypothetical protein		3	19	2	111	13.6364	98.2301	8.76316	1		8.0018730		25.0003844
Aryl-phospho-beta-D-glucosidase BglH	bglH_7	4	18	3	110	18.1818	97.3451	8.14815	1				29.0010550	3.2.1.86
hypothetical protein		4	18	3	110	18.1818	97.3451	8.14815	1		31.0006492		33.0001380
hypothetical protein		2	20	0	113	9.09091	100	inf	1				48.0000199
hypothetical protein		16	6	49	64	72.7273	56.6372	3.48299	1
hypothetical protein		9	13	22	91	40.9091	80.531	2.86364	1
hypothetical protein		7	15	64	49	31.8182	43.3628	0.357292	1
hypothetical protein		7	15	69	44	31.8182	38.9381	0.297585	1	1.0229859
hypothetical protein		6	16	61	52	27.2727	46.0177	0.319672	1
hypothetical protein		4	18	5	108	18.1818	95.5752	4.8	1	2.0065645
hypothetical protein		4	18	5	108	18.1818	95.5752	4.8	1
hypothetical protein	lplJ_1	4	18	48	65	18.1818	57.5221	0.300926	1
hypothetical protein		3	19	1	112	13.6364	99.115	17.6842	1
hypothetical protein	xerC_6	3	19	1	112	13.6364	99.115	17.6842	1
hypothetical protein		3	19	2	111	13.6364	98.2301	8.76316	1
ISL3 family transposase IS1476		2	20	0	113	9.09091	100	inf	1
hypothetical protein		2	20	0	113	9.09091	100	inf	1
hypothetical protein		2	20	0	113	9.09091	100	inf	1
hypothetical protein		2	20	0	113	9.09091	100	inf	1
hypothetical protein		2	20	0	113	9.09091	100	inf	1
hypothetical protein		2	20	0	113	9.09091	100	inf	1
hypothetical protein		2	20	0	113	9.09091	100	inf	1
hypothetical protein		2	20	0	113	9.09091	100	inf	1	41.0000259
hypothetical protein		2	20	0	113	9.09091	100	inf	1
hypothetical protein		2	20	0	113	9.09091	100	inf	1
hypothetical protein		2	20	0	113	9.09091	100	inf	1
hypothetical protein		2	20	0	113	9.09091	100	inf	1
hypothetical protein		2	20	0	113	9.09091	100	inf	1	11.0005500
hypothetical protein		2	20	0	113	9.09091	100	inf	1
hypothetical protein		2	20	0	113	9.09091	100	inf	1
hypothetical protein		2	20	0	113	9.09091	100	inf	1
hypothetical protein		2	20	0	113	9.09091	100	inf	1
hypothetical protein		2	20	0	113	9.09091	100	inf	1
IS3 family transposase ISEfa10	insK	2	20	43	70	9.09091	61.9469	0.162791	1
hypothetical protein		0	22	19	94	0	83.1858	0	1
D-alanine--D-alanyl carrier protein ligase	dltA	0	22	20	93	0	82.3009	0	1
hypothetical protein		0	22	18	95	0	84.0708	0	1
Tyrosine recombinase XerC	xerC_2	0	22	24	89	0	78.7611	0	1
hypothetical protein		0	22	18	95	0	84.0708	0	1
hypothetical protein		0	22	36	77	0	68.1416	0	1

## Sheet: Table S6
Table S6. Scoary output for gene presence-absence for phenotypic trait in CIRMBP Cluster 1. Columns are as in Table S3. Start is the genome start position for the locus in each of two sepsis isolate genomes with the position as contig.start position (formatted with leading zeroes). EC numbers are given where available for each locus. Loci are sorted on Start in CIRMBP-1229 genome. Loci that appea…
										Start
Locus		Positive		Negative		Sensi-tivity	Speci-ficity	Odds ratio	Bonferroni P-value	Sepsis		EC number
Annotation	Gene	present	absent	present	absent					CIRMBP-1211	CIRMBP-1229
hypothetical protein		2	2	0	22	50	100	inf	1		17.0014
hypothetical protein		3	1	2	20	75	90.9091	30	1	1.0116920	17.0025
hypothetical protein		3	1	2	20	75	90.9091	30	1	1.01167	17.0026
hypothetical protein		3	1	1	21	75	95.4545	63	1	1.0115480	17.0026
hypothetical protein		3	1	2	20	75	90.9091	30	1	1.0115	17.0026
hypothetical protein		3	1	2	20	75	90.9091	30	1	1.01141	17.0027
IS1182 family transposase IS1182		3	1	4	18	75	81.8182	13.5	1	20.0030043

## Sheet: Table S7
Table S7. Most differentially represented core genome SNPs distinguishing BCO and sepsis isolate genomes as determined using ParSNP. Filtered for genotype 1 sepsis frequency >>0.94 and frequency difference (sepsis-BCO) ≥ 0.3. SNP Position is for the reference (Ref) SA1 genome, with alternative (Alt) SNPs listed (first Alt SNP is Genotype 1, and second Alt SNP is Genotype 2). For each SNP position…
			Genotype 1			Genotype 2
SNP			Frequency			Frequency			CDS	Codon	PEG
Position	Ref	Alt	Sepsis	BCO	Diff	Sepsis	BCO	Diff	Base	Base	PEG	Start	Stop	Strand	Function
67637	T	C	0.941176	0.60177	0.339407	0	0	0	748	1	86	67602	68384	-	Putative ABC transporter ATP-binding protein YlmA
67679	C	G	0.941176	0.60177	0.339407	0	0	0	706	1
67680	C	T	0.941176	0.60177	0.339407	0	0	0	705	3
67683	A	G	0.941176	0.60177	0.339407	0	0	0	702	3
67728	C	T	0.941176	0.584071	0.357106	0	0	0	657	3
67731	T	A	0.941176	0.584071	0.357106	0	0	0	654	3
67740	A	G	0.941176	0.557522	0.383654	0	0	0	645	3
67751	G	A	0.941176	0.584071	0.357106	0	0	0	634	1
67755	G	A	0.941176	0.584071	0.357106	0	0	0	630	3
67766	T	C	0.941176	0.637168	0.304008	0	0	0	619	1
67812	A	C	0.941176	0.557522	0.383654	0	0	0	573	3
68021	C	T	0.941176	0.59292	0.348256	0	0	0	364	1
68090	T	C	0.941176	0.59292	0.348256	0	0	0	295	1
68104	T	C	0.941176	0.59292	0.348256	0	0	0	281	2
68124	C	T	0.941176	0.610619	0.330557	0	0	0	261	3
68250	C	T	0.941176	0.584071	0.357106	0	0	0	135	3
202029	A	C	0.941176	0.619469	0.321707	0	0	0	2517	3	229	199513	202548	+	Chromosome partition protein Smc
202030	T	C	0.941176	0.619469	0.321707	0	0	0	2518	1
202341	C	A	0.941176	0.495575	0.445601	0	0	0	2829	3
202359	C	A,T	1	0.654867	0.345133	0	0.00884956	-0.00884956	2847	3
202362	T	C	1	0.654867	0.345133	0	0	0	2850	3
202974	G	A	0.941176	0.637168	0.304008	0	0	0	522	3	230	202767	203495	-	Peroxide stress resistance protein YaaA
203148	G	T	0.941176	0.628319	0.312858	0	0	0	348	3
203361	A	T	1	0.646018	0.353982	0	0	0	135	3
203573	T	G	1	0.663717	0.336283	0	0	0	972	3	231	203492	204544	-	Hypothetical protein (serine aminopeptidase S33-like)
204068	A	C	1	0.690265	0.309735	0	0	0	477	3
205704	T	C,A	0.941176	0.575221	0.365955	0.0588235	0.20354	-0.144716	213	3	234	205215	205916	-	Alpha-acetolactate decarboxylase AldC
722183	A	G	0.941176	0.619469	0.321707	0	0	0	96	3	746	722088	724034	+	PTS fructose-specific EIIABC component
722213	A	G	0.941176	0.60177	0.339407	0	0	0	126	3
722267	T	C	0.941176	0.619469	0.321707	0	0	0	180	3
722309	G	A	0.941176	0.619469	0.321707	0	0	0	222	3
722315	A	G	0.941176	0.584071	0.357106	0	0	0	228	3
722318	G	T	0.941176	0.610619	0.330557	0	0	0	231	3
722894	C	T	1	0.619469	0.380531	0	0	0	807	3

## Sheet: Table S8
Table S8. Most differentially represented core genome SNPs distinguishing BCO and sepsis isolate genomes as determined using Maast. Filtered for genotype 1 sepsis frequency >0.5 and frequency difference (sepsis-BCO) ≥ 0.2. SNP Position is for the reference (Ref) SA1 genome, with alternative (Alt) SNPs listed (first Alt SNP is Genotype 1, and second Alt SNP is Genotype 2). For each SNP position, t…
			Genotype 1			Genotype 2
SNP			Frequency			Frequency			CDS	Codon	PEG
Position	Ref	Alt	Sepsis	BCO	Diff	Sepsis	BCO	Diff	Base	Base	PEG	Start	Stop	Strand	Function
69245	C	T	0.513274	0.272727	0.240547	0	0	0	1763	2	88	69208	71007	-	Zinc-transporting ATPase
69495	G	A	0.513274	0.318182	0.195093	0	0	0	1513	1
167523	A	C	0.522124	0.227273	0.294851	0	0	0	325	1	194	167521	167847	-	hypothetical protein
170518	G	T	0.530973	0.272727	0.258246	0	0	0	585	3	198	169934	170536	+	hypothetical protein
325074	T	A	0.513274	0.227273	0.286002	0	0	0	709	1	346	324766	325782	-	putative branched-chain-amino-acid aminotransferase
327616	C	T	0.530973	0.318182	0.212792	0	0	0	640	1	348	327152	328255	-	hypothetical protein
344612	C	T	0.530973	0.318182	0.212792	0	0	0	500	2	364	344113	344745	+	Putative phosphoserine phosphatase 2
349248	A	G	0.539823	0.272727	0.267096	0	0	0	1646	2	366	347603	349486	+	Asparagine synthetase [glutamine-hydrolyzing] 1
349257	A	G	0.539823	0.272727	0.267096	0	0	0	1655	2
354120	G	A	0.513274	0.318182	0.195093	0	0	0	359	2	373	353762	354682	+	Ribokinase
406802	G	A	0.513274	0.227273	0.286002	0	0	0	1133	2	427	405670	407403	+	putative ABC transporter ATP-binding protein
519662	A	G	0.522124	0.272727	0.249397	0	0	0	IG		547	519213	519584	-	Lactoylglutathione lyase
527127	A	G	0.513274	0.272727	0.240547	0	0	0	41	2	557	527087	527422	+	RNA polymerase sigma-54 factor RpoN
539383	G	C	0.522124	0.318182	0.203942	0	0	0	242	2	570	539142	539681	+	ATP synthase subunit delta
539925	C	T	0.522124	0.318182	0.203942	0	0	0	221	2	571	539705	541267	+	ATP synthase subunit alpha
539937	T	C	0.522124	0.318182	0.203942	0	0	0	233	2
540315	T	C	0.522124	0.318182	0.203942	0	0	0	611	2
543118	T	A	0.522124	0.318182	0.203942	0	0	0	908	2
544800	C	T	0.522124	0.318182	0.203942	0	0	0	137	2	576	544664	544900	+	hypothetical protein
545607	G	A	0.530973	0.318182	0.212792	0	0	0	675	3	577	544933	546231	+	UDP-N-acetylglucosamine 1-carboxyvinyltransferase 1
575850	A	G	0.513274	0.318182	0.195093	0	0	0	695	2	612	575447	576544	-	Xaa-Pro dipeptidase
588275	T	C	0.530973	0.272727	0.258246	0	0	0	1694	2	622	586582	588366	+	putative multidrug resistance ABC transporter ATP-binding/permease protein YheH
597206	A	G	0.513274	0.272727	0.240547	0	0	0	310	1	629	596897	597961	+	Threonine synthase
599458	C	T	0.530973	0.272727	0.258246	0	0	0	581	2	631	598878	599810	+	Homoserine O-acetyltransferase
602904	T	C	0.530973	0.272727	0.258246	0	0	0	623	2	636	602282	603238	+	PhoH-like protein
604485	G	A	0.530973	0.272727	0.258246	0	0	0	1218	3	637	603268	605469	+	Cyclic-di-AMP phosphodiesterase PgpH
605143	A	G	0.530973	0.272727	0.258246	0	0	0	1876	1
624513	C	T	0.530973	0.272727	0.258246	0	0	0	442	1	658	624072	624764	+	hypothetical protein
639642	C	A	0.530973	0.272727	0.258246	0	0	0	165	3	674	639478	639753	+	hypothetical protein
648360	T	A	0.530973	0.318182	0.212792	0	0	0	1110	3	681	647251	649146	+	Energy-dependent translational throttle protein EttA
648627	C	A	0.530973	0.318182	0.212792	0	0	0	1377	3
655459	G	A	0.530973	0.318182	0.212792	0	0	0	1227	3	689	654233	655645	+	Carboxy-terminal processing protease CtpA
657215	C	T	0.530973	0.318182	0.212792	0	0	0	892	1	691	656324	657775	+	DNA polymerase IV
657541	T	A	0.530973	0.318182	0.212792	0	0	0	1218	3
690492	T	C	0.513274	0.227273	0.286002	0	0	0	116	2	717	690377	691309	+	putative cell division protein WhiA
704153	G	A	0.522124	0.272727	0.249397	0	0	0	173	2	729	703981	704532	+	hypothetical protein
720664	G	A	0.530973	0.272727	0.258246	0	0	0	266	2	744	720399	721154	+	putative HTH-type transcriptional regulator YdjF
722761	C	T	0.522124	0.318182	0.203942	0	0	0	674	2	746	722088	724034	+	PTS system fructose-specific EIIABC component
723400	T	C	0.530973	0.318182	0.212792	0	0	0	1313	2
727626	C	T	0.530973	0.272727	0.258246	0	0	0	830	2	749	726797	729229	+	ATP-dependent DNA helicase PcrA
727734	C	G,T	0.522124	0.272727	0.249397	0.0265487	0	0.0265487	938	2
727740	T	C	0.522124	0.272727	0.249397	0	0	0	944	2
727750	G	A	0.522124	0.272727	0.249397	0	0	0	954	3
728298	C	T	0.513274	0.318182	0.195093	0	0	0	1502	2
728499	A	G	0.513274	0.318182	0.195093	0	0	0	1703	2
728511	A	C	0.513274	0.318182	0.195093	0	0	0	1715	2
728790	C	T	0.513274	0.318182	0.195093	0	0	0	1994	2
734409	T	C	0.530973	0.318182	0.212792	0	0	0	1271	2	753	733139	734569	+	Aspartyl/glutamyl-tRNA(Asn/Gln) amidotransferase subunit B
773581	G	A	0.530973	0.318182	0.212792	0	0	0	332	2	794	773250	773990	+	hypothetical protein
774250	T	G,A	0.522124	0.318182	0.203942	0.0176991	0	0.0176991	164	2	795	774087	774713	+	hypothetical protein
774343	C	T	0.522124	0.318182	0.203942	0	0	0	257	2
774538	T	C	0.522124	0.318182	0.203942	0	0	0	452	2
1196481	G	A	0.539823	0.272727	0.267096	0	0	0	190	1	1204	1196173	1196670	-	Thiamine precursor transporter HmpT
1197306	G	A	0.513274	0.318182	0.195093	0	0	0	172	1	1205	1196680	1197477	-	Pyridoxine kinase
1201560	G	A	0.530973	0.318182	0.212792	0	0	0	200	2	1210	1201361	1201789	+	hypothetical protein
1215736	A	C	0.522124	0.318182	0.203942	0	0	0	655	1	1225	1215557	1216390	-	Catechol-2,3-dioxygenase
1218922	G	A	0.522124	0.318182	0.203942	0	0	0	250	1	1228	1218599	1219171	-	hypothetical protein
1218928	T	C	0.513274	0.318182	0.195093	0	0	0	244	1
1227718	A	T	0.522124	0.318182	0.203942	0	0	0	211	1	1233	1226207	1227928	-	ATP-binding/permease protein CydD
1248994	T	C	0.522124	0.318182	0.203942	0	0	0	259	1	1253	1248809	1249252	-	GNAT family N-acetyltransferase ElaA
1249257	T	C	0.522124	0.272727	0.249397	0	0	0	IG
1267489	C	T	0.522124	0.272727	0.249397	0	0	0	IG		1276	1266874	1267383	+	hypothetical protein
1514661	T	A	0.513274	0.318182	0.195093	0	0	0	2414	2	1517	1512248	1514746	+	Negative regulator of genetic competence ClpC/MecB
1614389	C	A	0.530973	0.318182	0.212792	0	0	0	2492	2	1612	1611898	1615488	+	Chromosome partition protein Smc
1614571	C	A	0.530973	0.318182	0.212792	0	0	0	2674	1
1661271	T	A	0.513274	0.272727	0.240547	0	0	0	431	2	1661	1660841	1662367	+	4-chlorobenzoate--CoA ligase CBCL1
1734692	G	A	0.513274	0.318182	0.195093	0	0	0	794	2	1737	1734004	1735485	-	Anthranilate synthase component 1
1955453	C	G	0.513274	0.272727	0.240547	0	0	0	IG		1938	1954657	1955331	+	Cell division protein DivIVA
1973276	T	C	0.530973	0.318182	0.212792	0	0	0	71	2	1950	1973206	1974072	+	Putative fructokinase
1981205	C	T	0.513274	0.272727	0.240547	0	0	0	1243	1	1956	1981095	1982447	-	hypothetical protein
1984163	C	T	0.513274	0.318182	0.195093	0	0	0	71	2	1958	1984093	1985856	+	Intracellular maltogenic amylase
2107146	A	G	0.522124	0.318182	0.203942	0	0	0	139	1	2076	2106844	2107284	-	putative protein YueI
2140000	T	A	0.522124	0.318182	0.203942	0	0	0	1814	2	2107	2138187	2140271	+	Elongation factor G
2140048	C	T	0.522124	0.318182	0.203942	0	0	0	1862	2
2140361	C	T,G	0.513274	0.318182	0.195093	0.00884956	0	0.00884956	IG
2159815	A	G	0.530973	0.272727	0.258246	0	0	0	IG		2141	2159247	2159657	+	hypothetical protein
2159860	T	A	0.530973	0.272727	0.258246	0	0	0	IG

## Sheet: Table S9
Table S9. Protein variations of selected annotated polypeptides from sepsis and BCO isolate genomes. For each protein encoded gene the reference position (Cons Pos) and variant position (Var Pos) are indicated along with the Type of variation, the reference (Cons Bases) amino acid(s), the variant (Var Bases) amino acid(s), followed by the percent of isolates containing that variant in the Strict …
Putative ABC transporter ATP-binding protein YlmA
Cons Pos	63	88	94	99	122	130	170	187	188	191	200	207	219	225	236	250
Var Pos	63	88	94	99	122	130	170	187	188	191	200	207	219	225	236	250
Type	Sub	Sub	Sub	Sub	Sub	Sub	Sub	Sub [2]	Sub	Sub	Sub	Sub	Sub	Sub	Sub	Sub
Cons Bases	G	R	S	V	K	A	G	ME	E	E	H	A	R	P	Q	E
Var Bases	D	H	N	I	E	V	A	IA	A	D	N	T	Q	L	E	K
Sepsis	46.875	0	9.375	9.375	9.375	3.125	0	0	12.5	9.375	0	9.375	0	0	9.375	9.375
BCO	8.84956	0.884956	40.708	40.708	40.708	14.1593	11.5044	0.884956	43.3628	44.2478	0.884956	36.2832	1.76991	1.76991	39.823	39.823
Chromosome partition protein Smc
Cons Pos	17	44	61	70	93	153	178	203	213	216	252	262	275	285	290	293	293	293	296	312	320	322	325	325	334	339	342	343	345	347	350	351	354	354	354	354	357	357	357	359	360	361	361	361	361	364	364	364	364
Var Pos	17	44	61	70	93	153	178	203	213	216	252	262	275	285	290	293	293	293	295	312	320	322	325	325	334	339	342	343	345	298	350	302	354	354	305	305	357	357	357	310	360	361	361	312	361	364	364	315	364
Type	Sub	Sub	Sub	Sub	Sub	Sub	Sub	Sub	Sub	Sub	Sub	Sub	Sub	Sub	Sub [2]	Sub	Sub	Sub	Del [49]	Sub	Sub	Sub	Sub	Sub	Sub [2]	Sub [2]	Sub [2]	Sub	Sub [8]	Sub [2]	Sub	Sub	Sub	Sub	Sub [4]	Sub [4]	Sub	Sub	Sub	Sub	Sub	Sub	Sub	Sub	Sub	Sub	Sub	Sub	Sub [2]
Cons Bases	V	V	E	K	E	K	D	G	K	D	G	N	V	A	NQ	V	V	V	LKVLSYKVPGLVDGVNKLVGGGNQFVD...	K	F	D	N	N	AG	SQ	AA	A	LQTMQGQL	TM	G	Q	D	D	DLAN	DLAN	N	N	N	I	N	Q	Q	Q	Q	E	E	E	EG
Var Bases	A	I	K	R	D	Q	E	S	N	A	S	T	I	V	GD	F	S	A	---------------------------...	Q	L	G	G	D	LK	AT	SK	T	MTDLNSKV	KL	S	N	A	T	EIIA	EIID	E	G	K	V	K	K	N	K	E	K	D	D	AS
Sepsis	37.5	3.125	3.125	3.125	9.375	3.125	37.5	0	3.125	3.125	0	6.25	3.125	0	0	3.125	0	0	0	6.25	3.125	0	3.125	3.125	37.5	37.5	37.5	28.125	37.5	0	0	0	21.875	37.5	0	0	3.125	37.5	9.375	0	37.5	18.75	3.125	0	0	3.125	37.5	0	18.75
BCO	8.84956	7.9646	6.19469	5.30973	26.5487	7.9646	10.6195	2.65487	0.884956	1.76991	1.76991	6.19469	23.0088	3.53982	2.65487	0	2.65487	2.65487	2.65487	23.8938	5.30973	0.884956	23.0088	3.53982	2.65487	2.65487	2.65487	36.2832	2.65487	2.65487	2.65487	2.65487	29.2035	2.65487	1.76991	0.884956	3.53982	2.65487	7.07965	2.65487	2.65487	25.6637	3.53982	2.65487	2.65487	3.53982	2.65487	2.65487	25.6637
Peroxide stress resistance protein YaaA
Cons Pos	14	17	17	17	19	22	26	29	29	33	36	43	44	49	52	58	65	66	67	68	109	135	142	143	147	152	155	185	209	215	216	242	243
Var Pos	14	17	17	17	19	22	26	29	29	33	36	43	44	49	52	58	65	66	67	68	109	135	142	143	147	152	155	185	209	215	216	242	243
Type	Sub [2]	Sub	Sub [3]	Sub [3]	Sub	Sub	Sub	Sub	Sub	Sub	Sub	Sub	Sub	Sub	Sub	Sub	Sub	Sub	Sub [2]	Sub	Sub	Sub	Sub	Sub	Sub	Sub	Sub	Sub	Sub	Sub [2]	Sub	Sub	Ins [2]
Cons Bases	AI	D	DQS	DQS	S	A	K	E	E	T	E	Q	K	N	M	A	K	Q	NA	A	Y	S	S	S	A	E	F	G	K	DI	I	V	--
Var Bases	SV	E	NKP	SKP	A	V	E	D	A	A	D	K	E	K	I	V	Q	L	DT	T	H	P	A	F	T	K	L	D	Q	EV	V	C	RK
Sepsis	0	3.125	0	0	28.125	6.25	3.125	0	3.125	12.5	9.375	0	25	6.25	0	0	0	3.125	0	0	3.125	53.125	3.125	6.25	0	0	15.625	25	3.125	3.125	3.125	3.125	3.125
BCO	3.53982	1.76991	2.65487	0.884956	31.8584	3.53982	1.76991	0.884956	1.76991	16.8142	12.3894	0.884956	30.0885	25.6637	1.76991	2.65487	2.65487	1.76991	2.65487	1.76991	22.1239	12.3894	23.0088	3.53982	0.884956	0.884956	56.6372	30.0885	24.7788	5.30973	9.73451	0.884956	0.884956
Hypothetical protein (PEG 231)
Cons Pos	38	42	44	46	78	105	127	147	152	154	163	177	178	180	205	211	212	213	247	261	261	275	302	310	343	345	350
Var Pos	38	42	44	46	78	105	127	147	152	154	163	177	178	180	205	211	212	213	247	261	261	275	302	310	343	345	350
Type	Sub	Sub	Sub	Sub	Sub [2]	Sub	Sub	Sub	Sub	Sub	Sub	Sub	Sub	Sub	Sub	Sub	Sub	Sub	Sub	Sub	Sub	Sub	Sub	Sub	Sub	Sub	Ins
Cons Bases	K	V	Q	I	IV	V	M	R	P	S	M	E	H	I	F	S	A	L	R	T	T	D	T	N	N	Q	-
Var Bases	T	L	H	V	VI	I	I	C	S	N	I	K	N	V	L	N	T	I	H	A	I	G	N	H	K	K	S
Sepsis	0	3.125	0	62.5	3.125	3.125	6.25	56.25	0	6.25	0	0	56.25	3.125	25	25	0	3.125	0	65.625	3.125	56.25	3.125	3.125	15.625	12.5	15.625
BCO	2.65487	0	3.53982	42.4779	0.884956	5.30973	6.19469	26.5487	2.65487	12.3894	1.76991	4.42478	26.5487	0.884956	30.0885	32.7434	1.76991	0	0.884956	34.5133	0.884956	26.5487	0	4.42478	38.9381	38.9381	40.708
Alpha-acetolactate decarboxylase AldC
Cons Pos	83	87	94	95	127	219
Var Pos	83	87	94	95	127	219
Type	Sub	Sub	Sub	Sub	Sub	Sub
Cons Bases	E	P	S	E	V	E
Var Bases	K	S	R	K	I	G
Sepsis	0	3.125	0	0	3.125	3.125
BCO	1.76991	0	0.884956	15.9292	0	11.5044
PTS fructose-specific EIIABC component
Cons Pos	2	53	127	137	152	154	156	156	158	160	170	211	214	272	277	278	399	429	466	480	500	518	543	555	590	638
Var Pos	2	53	127	137	152	154	156	156	158	160	170	211	214	272	277	278	399	429	466	480	500	518	543	555	590	638
Type	Sub	Sub	Sub	Sub	Sub	Sub	Sub	Sub [2]	Sub	Sub	Sub	Sub	Sub	Sub	Sub	Sub	Sub	Sub	Sub	Sub	Sub	Sub	Sub	Sub	Sub	Sub
Cons Bases	K	A	A	S	E	H	A	AK	A	E	A	T	E	G	A	S	A	A	I	S	P	A	T	R	A	L
Var Bases	E	V	V	T	D	N	E	ST	V	G	S	A	D	S	S	G	V	S	N	G	L	S	I	Q	V	I
Sepsis	37.5	3.125	3.125	37.5	3.125	3.125	3.125	12.5	12.5	50	0	3.125	0	0	37.5	0	0	3.125	0	37.5	0	6.25	0	75	75	3.125
BCO	5.30973	6.19469	10.6195	5.30973	0	0	1.76991	28.3186	23.0088	36.2832	0.884956	0	0.884956	0.884956	1.76991	12.3894	0.884956	0.884956	0.884956	5.30973	0.884956	4.42478	12.3894	32.7434	29.2035	0.884956
4-chlorobenzoate--CoA ligase CBCL1
Cons Pos	20	43	54	72	87	115	127	132	135	136	143	143	144	147	149	159	198	201	207	244	246	249	268	294	339	352	359	366	400	460	468	472	508
Var Pos	20	43	54	72	87	115	127	132	135	136	143	143	144	147	149	159	198	201	207	244	246	249	268	294	339	352	359	366	400	460	468	472	508
Type	Sub	Sub	Sub	Sub	Sub	Sub	Sub	Sub	Sub	Sub	Sub	Sub	Sub	Sub	Sub [2]	Sub	Sub	Sub	Sub	Sub	Sub	Sub	Sub	Sub	Sub	Sub	Sub	Sub	Sub	Sub	Sub	Sub	Sub
Cons Bases	Q	S	K	M	A	K	R	K	G	A	a	a	R	A	EI	D	T	A	A	G	I	H	A	H	V	E	A	H	M	E	Q	D	G
Var Bases	E	T	E	V	V	N	C	N	D	D	S	N	Q	S	DT	G	M	T	G	H	L	Y	V	Y	I	D	T	N	I	K	K	Y	E
Sepsis	25	18.75	18.75	0	3.125	25	18.75	53.125	56.25	18.75	31.25	50	18.75	0	18.75	18.75	0	0	3.125	68.75	68.75	68.75	21.875	31.25	3.125	0	43.75	0	31.25	0	31.25	0	3.125
BCO	24.7788	44.2478	44.2478	2.65487	12.3894	24.7788	42.4779	23.8938	29.2035	48.6726	41.5929	9.73451	48.6726	1.76991	48.6726	42.4779	0.884956	2.65487	12.3894	43.3628	43.3628	43.3628	42.4779	51.3274	3.53982	2.65487	9.73451	1.76991	47.7876	2.65487	52.2124	2.65487	1.76991
Thiamine precursor transporter HmpT
Cons Pos	1	58	93	108	121	143	162
Var Pos	1	55	90	105	118	140	159
Type	Ins [3]	Sub	Sub	Sub	Sub	Sub	Sub
Cons Bases	---	I	Q	L	A	A	M
Var Bases	MKK	V	K	I	S	V	I
Sepsis	3.125	25	3.125	28.125	3.125	28.125	15.625
BCO	4.42478	6.19469	6.19469	12.3894	0	7.07965	7.9646
Protein ElaA
Cons Pos	12	40	66	106	113	122	128	128	139
Var Pos	12	40	66	106	113	122	128	128	139
Type	Sub	Sub [2]	Sub [2]	Sub	Sub	Sub	Sub	Sub [2]	Sub
Cons Bases	S	EH	DE	V	H	G	N	NA	D
Var Bases	T	AY	ED	I	Y	D	K	KV	G
Sepsis	15.625	53.125	25	18.75	0	0	68.75	3.125	0
BCO	39.823	39.823	38.0531	16.8142	0.884956	0.884956	33.6283	6.19469	0.884956
Carboxy-terminal processing protease CtpA
Cons Pos	4	4	9	25	28	31	34	43	43	87	98	103	141	146	197	200	202	216	216	220	220	265	268	269	275	279	284	284	299	311	311	314	315	358	361	364	380	383	383	394	407	410	413
Var Pos	4	4	9	25	28	31	34	43	43	87	98	103	141	146	197	200	202	216	216	220	220	265	268	269	275	279	284	284	299	311	311	314	315	358	361	364	380	383	383	394	407	410	413
Type	Sub	Sub	Sub	Sub	Sub	Sub	Sub	Sub	Sub	Sub	Sub	Sub	Sub	Sub	Sub	Sub	Sub	Sub	Sub	Sub	Sub	Sub	Sub	Sub	Sub	Sub	Sub	Sub	Sub	Sub	Sub	Sub [2]	Sub	Sub	Sub	Sub	Sub	Sub	Sub	Sub	Sub	Sub	Sub
Cons Bases	L	L	I	V	F	N	T	H	H	T	V	V	P	S	Q	F	H	D	D	T	T	D	T	Q	A	Y	Q	Q	A	K	K	IV	V	S	V	A	N	G	G	E	N	A	T
Var Bases	P	S	V	M	L	K	S	Q	D	N	A	M	S	N	P	S	Y	A	S	N	S	N	P	R	D	H	E	A	T	N	H	VI	I	L	I	V	S	P	E	D	D	T	I
Sepsis	43.75	0	0	0	0	0	0	0	0	0	6.25	0	0	0	6.25	0	0	40.625	0	40.625	0	9.375	0	0	3.125	9.375	9.375	0	0	40.625	9.375	0	53.125	9.375	9.375	0	0	50	3.125	9.375	50	21.875	9.375
BCO	12.3894	2.65487	2.65487	0.884956	2.65487	0.884956	1.76991	3.53982	1.76991	0.884956	15.9292	0.884956	1.76991	1.76991	3.53982	2.65487	0.884956	3.53982	1.76991	3.53982	1.76991	8.84956	2.65487	1.76991	0	8.84956	5.30973	0.884956	0.884956	6.19469	6.19469	2.65487	13.2743	6.19469	6.19469	3.53982	1.76991	9.73451	0	6.19469	12.3894	53.0973	8.84956
putative HTH-type transcriptional regulator YdjF
Cons Pos	13	23	73	77	84	101	119	125	143	158	158	190	223
Var Pos	13	23	73	77	84	101	119	125	143	158	158	190	223
Type	Sub	Sub	Sub	Sub	Sub	Sub	Sub	Sub	Sub	Sub	Sub	Sub	Sub
Cons Bases	T	A	A	D	R	G	V	K	T	T	T	I	T
Var Bases	A	S	T	E	H	C	I	M	A	S	I	M	S
Sepsis	0	0	3.125	6.25	9.375	3.125	3.125	3.125	9.375	37.5	3.125	37.5	37.5
BCO	6.19469	2.65487	0	33.6283	20.354	0	0	7.07965	36.2832	15.9292	0	6.19469	6.19469
putative cell division protein WhiA
Cons Pos	4	17	46	161	308
Var Pos	4	17	46	160	308
Type	Sub	Sub	Sub	Del [2]	Sub
Cons Bases	A	H	V	CS	Q
Var Bases	T	R	I	--	E
Sepsis	3.125	3.125	46.875	0	3.125
BCO	0	0	4.42478	0.884956	0
Energy-dependent translational throttle protein EttA
Cons Pos	17	20	34	37	40	99	106	137	209	224	264	310	371	375	380	436	460	464	469	472	475	477	484	487	490	534	536	538	543	543	549	579	585	586	614
Var Pos	17	20	34	37	40	99	106	137	209	224	264	310	371	375	380	436	460	464	469	472	475	477	484	487	490	534	536	538	543	543	549	579	585	586	614
Type	Sub	Sub	Sub	Sub	Sub	Sub	Sub	Sub	Sub	Sub	Sub	Sub	Sub	Sub	Sub	Sub	Sub	Sub	Sub	Sub	Sub	Sub	Sub	Sub [2]	Sub	Sub	Sub	Sub [2]	Sub	Sub [2]	Sub	Sub	Sub [2]	Sub	Sub
Cons Bases	I	N	L	V	T	A	S	Q	A	A	I	M	L	N	V	T	Q	V	E	N	D	E	D	QQ	P	T	T	AA	L	LT	A	T	RL	L	Q
Var Bases	V	K	F	I	S	G	A	K	T	T	M	I	I	S	A	M	K	A	A	I	P	V	A	HH	S	A	N	TL	P	PN	T	A	SQ	Q	R
Sepsis	0	21.875	3.125	3.125	40.625	0	68.75	40.625	3.125	0	46.875	0	21.875	0	0	62.5	21.875	0	0	0	0	0	0	0	0	65.625	59.375	59.375	0	59.375	3.125	0	3.125	0	3.125
BCO	2.65487	23.8938	0	1.76991	2.65487	4.42478	39.823	2.65487	0	0.884956	4.42478	1.76991	53.0973	4.42478	0.884956	30.9735	53.0973	0.884956	0.884956	0.884956	0.884956	0.884956	0.884956	0.884956	1.76991	38.9381	36.2832	36.2832	4.42478	31.8584	2.65487	1.76991	1.76991	2.65487	0
Cyclic-di-AMP phosphodiesterase PgpH
Cons Pos	40	114	118	123	132	136	159	179	182	185	186	214	214	297	297	299	310	310	331	335	346	363	365	383	389	397	407	413	413	420	420	426	426	457	465	465	482	622	626
Var Pos	40	114	118	123	132	136	159	1	4	7	186	214	36	297	119	299	310	132	331	335	346	363	365	383	389	397	407	413	235	420	242	426	248	457	465	287	482	622	626
Type	Sub	Sub [2]	Sub	Sub	Sub	Sub	Sub	Sub [2]	Sub [2]	Sub	Sub	Sub	Sub	Sub	Sub	Sub	Sub	Sub	Sub	Sub	Sub	Sub	Sub	Sub	Sub	Sub	Sub	Sub	Sub	Sub	Sub	Sub	Sub	Sub	Sub	Sub	Sub	Sub	Sub
Cons Bases	K	QE	D	D	T	V	T	SL	YI	Q	E	E	E	A	A	V	R	R	V	V	S	V	V	V	D	T	G	M	M	N	N	M	M	L	V	V	V	D	K
Var Bases	R	EI	E	G	A	I	S	MD	RQ	K	V	D	D	V	V	I	C	C	I	A	A	I	I	L	G	I	S	L	L	K	K	I	I	F	A	A	I	N	R
Sepsis	0	0	0	0	0	0	0	0	0	0	3.125	0	0	0	0	0	0	0	0	0	0	0	40.625	0	3.125	0	18.75	0	0	0	0	0	0	0	0	0	0	0	18.75
BCO	1.76991	1.76991	1.76991	1.76991	1.76991	1.76991	1.76991	0.884956	0.884956	0.884956	0.884956	1.76991	0.884956	7.07965	0.884956	3.53982	3.53982	0.884956	3.53982	0.884956	3.53982	3.53982	3.53982	3.53982	0	0.884956	53.0973	5.30973	0.884956	7.07965	0.884956	1.76991	0.884956	1.76991	1.76991	0.884956	1.76991	3.53982	53.0973
PhoH-like protein
Cons Pos	2	4	52	122	129	204	215
Var Pos	2	4	52	122	129	204	215
Type	Sub	Sub	Sub	Sub	Sub	Sub	Sub
Cons Bases	A	H	E	H	N	I	V
Var Bases	T	Y	A	Y	S	V	M
Sepsis	0	0	0	0	0	3.125	18.75
BCO	1.76991	0.884956	3.53982	0.884956	4.42478	0.884956	19.469
RNA polymerase sigma-54 factor RpoN
Cons Pos	12	22	22	46	105	124	129	130	138	182	182	193	218	228	234	242	273	277	290	294	310	316	317	318	367	369	370	371	373	409	409	437
Var Pos	11	20	22	46	105	124	129	130	138	180	45	193	218	228	234	240	273	277	290	294	310	316	316	318	367	367	368	371	373	407	270	433
Type	Del [2]	Sub	Sub	Sub	Sub	Sub	Sub	Sub	Sub	Sub	Sub	Sub	Sub	Sub	Sub	Sub	Sub	Sub	Sub	Sub	Sub	Sub	Del [11]	Sub	Sub [4]	Sub	Sub	Ins [2]	Sub [5]	Sub	Sub	Sub
Cons Bases	TQ	T	T	M	I	L	Q	I	M	E	E	D	P	E	P	E	I	K	R	M	A	L	DATRPLKPLTM	A	IVGT	G	T	--	DGKEV	A	A	R
Var Bases	--	S	S	T	T	F	K	V	I	D	D	E	L	D	S	K	Q	I	Q	I	V	M	-----------	S	NSRN	R	I	RW	QRSGM	V	V	K
Sepsis	37.5	37.5	37.5	3.125	0	37.5	0	0	3.125	21.875	0	0	0	0	0	6.25	0	0	0	0	0	0	0	0	0	6.25	0	0	0	37.5	0	0
BCO	25.6637	24.7788	13.2743	0	2.65487	12.3894	0.884956	2.65487	2.65487	20.354	0.884956	2.65487	0.884956	2.65487	0.884956	0	2.65487	0.884956	2.65487	2.65487	2.65487	1.76991	1.76991	2.65487	0.884956	0	0.884956	0.884956	0.884956	13.2743	0.884956	0.884956
UDP-N-acetylglucosamine 1-carboxyvinyltransferase 1
Cons Pos	35	88	103	103	123	223	226	243	243	252	290	290	314	353	381	432
Var Pos	35	88	103	10	123	223	226	243	150	252	290	197	314	353	381	432
Type	Sub	Sub	Sub	Sub	Sub	Sub	Sub	Sub	Sub	Sub	Sub	Sub	Sub	Sub	Sub	Sub
Cons Bases	A	Y	P	P	K	H	G	V	V	V	E	E	A	V	A	A
Var Bases	V	C	S	S	A	Y	S	I	I	I	D	D	V	A	V	E
Sepsis	0	0	0	0	3.125	3.125	21.875	62.5	0	6.25	59.375	0	3.125	15.625	3.125	6.25
BCO	1.76991	0.884956	2.65487	0.884956	15.0442	0	53.0973	22.1239	0.884956	3.53982	24.7788	0.884956	0	16.8142	12.3894	3.53982
putative multidrug resistance ABC transporter ATP-binding/permease protein YheH
Cons Pos	13	17	23	28	43	46	82	83	166	173	195	200	247	250	250	318	331	333	341	343	350	357	371	427	427	453	457	463	533	578	579	590	592
Var Pos	13	17	23	28	43	46	82	83	166	173	195	200	247	250	250	318	331	333	341	343	350	357	371	427	427	453	457	463	533	578	579	590	592
Type	Sub	Sub	Sub	Sub	Sub	Sub	Sub	Sub	Sub	Sub	Sub	Sub	Sub	Sub	Sub	Sub	Sub	Sub	Sub	Sub [2]	Sub	Sub	Sub	Sub	Sub	Sub	Sub	Sub	Sub	Sub	Sub	Sub	Sub [3]
Cons Bases	I	A	T	R	A	V	A	T	V	K	R	I	R	Y	Y	A	M	T	K	LE	R	H	D	E	E	D	E	A	Q	D	G	S	EEI
Var Bases	L	T	I	H	T	I	G	S	I	R	K	F	H	N	K	T	L	M	N	FA	K	N	N	N	D	E	K	S	K	N	S	I	GAD
Sepsis	71.875	3.125	3.125	0	3.125	18.75	21.875	3.125	21.875	3.125	0	3.125	40.625	3.125	0	31.25	3.125	0	18.75	21.875	21.875	25	25	40.625	9.375	0	0	3.125	0	65.625	0	65.625	68.75
BCO	43.3628	1.76991	4.42478	0.884956	1.76991	50.4425	20.354	2.65487	50.4425	0	1.76991	0	2.65487	8.84956	3.53982	39.823	0	0.884956	20.354	20.354	20.354	20.354	20.354	2.65487	13.2743	2.65487	2.65487	0	2.65487	28.3186	0.884956	28.3186	28.3186
[truncated: 178 more columns]
